# Supplementary material
Source: MDPI journal article supplement (https://www.mdpi.com/1424-2818/13/10/494)
Supplement: s1 [file s1]

# 16S rRNA gene amplicon sequencing data of the Iron Quadrangle ferruginous caves (Brazil) shows the importance of conserving this singular and threatened geosystem

**Short title:** 16S rRNA gene amplicon sequencing of ferruginous caves

Camila Gracyelle de Carvalho Lemes<sup>1</sup>, Morghana Marina Villa<sup>2</sup>, Érica Barbosa Felestrino<sup>1</sup>, Luiza Oliveira Perucci<sup>3</sup>, Renata Almeida Barbosa Assis<sup>1</sup>, Isabella Ferreira Cordeiro<sup>1</sup>, Natasha Peixoto Fonseca<sup>1</sup>, Lara Chaves Carvalho Guerra<sup>2</sup>, Washington Luiz Caneschi<sup>1</sup>, Lauro Ângelo Gonçalves de Moraes<sup>4</sup>, Flávio Fonseca do Carmo<sup>5</sup>, Luciana Hiromi Yoshino Kamino<sup>5</sup>, Pedro Navarro Cardoso Vale<sup>6</sup>, Suzana Eiko Sato Guima<sup>7</sup>, João Carlos Setubal<sup>7</sup>, André Augusto Rodrigues Salgado<sup>6</sup>, Leandro Marcio Moreira<sup>1,2#</sup>.

**Supplementary Table S1. Sequencing data of collected samples.**

| #  | Sample  | Cave | Collection place | Barcode    | Bioproject PRJNA575049     | Sequencing data |                 |                       | Taxons prediction (OTUs) |                      |                           |                               |
|----|---------|------|------------------|------------|----------------------------|-----------------|-----------------|-----------------------|--------------------------|----------------------|---------------------------|-------------------------------|
|    |         |      |                  |            | Biosample accession number | Number of bases | Number of reads | Mean Read Length (bp) | Number of phyla (P)      | Number of genera (G) | Non-redundant at cave P/G | Average (SD) P/G              |
| 1  | MC1F1   | 1    | Floor            | CTAAGGTAAC | SAMN12876970               | 33,668,062      | 196,487         | 171                   | 23                       | 152                  | 27/189                    | 23,5<br>(1,0)/148,0<br>(10,7) |
| 2  | MC1F2   | 1    | Floor            | TAAGGAGAAC | SAMN12876971               | 27,729,374      | 129,281         | 214                   | 25                       | 155                  |                           |                               |
| 3  | MC1C1   | 1    | Ceiling          | AAGAGGATTC | SAMN12876972               | 23,481,858      | 116,742         | 201                   | 23                       | 132                  |                           |                               |
| 4  | MC1C2   | 1    | Ceiling          | TACCAAGATC | SAMN12876973               | 35,221,378      | 182,483         | 193                   | 23                       | 153                  |                           |                               |
| 5  | MC2F1A  | 2    | Floor            | CAGAAGGAAC | SAMN12876974               | 33,371,557      | 174,006         | 192                   | 22                       | 183                  | 26/216                    | 20,0<br>(4,3)/147,0<br>(33,4) |
| 6  | MC2F2A  | 2    | Floor            | CTGCAAGTTC | SAMN12876975               | 60,918,051      | 358,109         | 170                   | 23                       | 182                  |                           |                               |
| 7  | MC2C1A  | 2    | Ceiling          | TTCGTGATTC | SAMN12876976               | 36,754,698      | 187,706         | 196                   | 15                       | 118                  |                           |                               |
| 8  | MC2C2A  | 2    | Ceiling          | TTCCGATAAC | SAMN12876977               | 31,954,172      | 184,115         | 174                   | 14                       | 101                  |                           |                               |
| 9  | MC2FB   | 2    | Floor            | TGAGCGGAAC | SAMN12876978               | 53,737,772      | 281,825         | 191                   | 23                       | 143                  |                           |                               |
| 10 | MC2SB   | 2    | Biofilm          | CTGACCGAAC | SAMN12876979               | 49,797,749      | 308,819         | 161                   | 23                       | 155                  |                           |                               |
| 11 | MC3F    | 3    | Floor            | TCCTCGAATC | SAMN12876980               | 37,108,725      | 218,346         | 170                   | 21                       | 162                  | 23/183                    | 19,5<br>(2,1)/137,0<br>(35,4) |
| 12 | MC3C    | 3    | Ceiling          | TAGGTGGTTC | SAMN12876981               | 34,991,048      | 107,025         | 327                   | 18                       | 112                  |                           |                               |
| 13 | GC1F    | 4    | Floor            | TCTAACGGAC | SAMN12876982               | 32,037,345      | 206,242         | 155                   | 24                       | 161                  | 24/161                    | 24/161                        |
| 14 | GMC1FAF | 5    | Floor            | TTGGAGTGTC | SAMN12876983               | 42,668,359      | 239,859         | 178                   | 26                       | 162                  | 27/208                    |                               |

|    |         |   |         |            |              |            |         |     |    |     |        |                               |
|----|---------|---|---------|------------|--------------|------------|---------|-----|----|-----|--------|-------------------------------|
| 15 | GMC1CAF | 5 | Ceiling | TCTAGAGGTC | SAMN12876984 | 22,032,158 | 128,998 | 171 | 24 | 160 |        | 23,7<br>(1,8)/149,5<br>(23,0) |
| 16 | GMC1FE  | 5 | Floor   | TCTGGATGAC | SAMN12876985 | 35,391,068 | 200,623 | 176 | 23 | 129 |        |                               |
| 17 | GMC1CE  | 5 | Ceiling | TCTATTGTC  | SAMN12876986 | 33,332,423 | 187,728 | 178 | 21 | 115 |        |                               |
| 19 | GMC1CG  | 5 | Ceiling | TTAGTCGGAC | SAMN12876987 | 29,755,581 | 153,085 | 194 | 25 | 177 |        |                               |
| 20 | LCFAB   | 6 | Floor   | CAGATCCATC | SAMN12876988 | 27,163,571 | 112,004 | 243 | 23 | 154 | 27/214 | 22,6<br>(2,6)/156,2<br>(12,1) |
| 21 | LCFCE   | 6 | Floor   | TCGCAATTAC | SAMN12876989 | 42,090,700 | 207,298 | 203 | 25 | 173 |        |                               |
| 22 | LCCAB   | 6 | Ceiling | TTCGAGACGC | SAMN12876990 | 20,717,017 | 84,003  | 247 | 19 | 149 |        |                               |
| 23 | LCCCE   | 6 | Ceiling | TGCCACGAAC | SAMN12876991 | 46,229,115 | 222,335 | 208 | 25 | 163 |        |                               |
| 24 | LCCF    | 6 | Ceiling | AACCTCATTC | SAMN12876992 | 40,791,827 | 218,176 | 187 | 21 | 142 | 23/168 | 21,5<br>(0,7)/143,5<br>(5,0)  |
| 25 | LQCF*   | 7 | Floor   | CCTGAGATAC | SAMN12876993 | 54,676,744 | 304,547 | 180 | 21 | 140 |        |                               |
| 26 | LQCC*   | 7 | Ceiling | TTACAACCTC | SAMN12876994 | 34,714,249 | 203,685 | 170 | 22 | 147 | 27/202 | 20,5<br>(4,9)/132,0<br>(21,2) |
| 27 | SMF1    | 8 | Floor   | AACCATCCGC | SAMN12876995 | 36,569,387 | 181,685 | 201 | 14 | 103 |        |                               |
| 28 | SMF2    | 8 | Floor   | ATCCGGAATC | SAMN12876996 | 51,511,429 | 263,203 | 196 | 26 | 154 |        |                               |
| 29 | SMC1    | 8 | Ceiling | TCGACCACTC | SAMN12876997 | 43,295,850 | 225,117 | 192 | 21 | 135 |        |                               |
| 30 | SMC2    | 8 | Ceiling | CGAGGTTATC | SAMN12876998 | 32,177,417 | 159,843 | 201 | 21 | 136 |        |                               |

\* Cave control samples (quarzitic cave); #18 was excluded; SD – Standard deviation.
