# Supplementary material
Source: MDPI journal article supplement (https://www.mdpi.com/1424-2818/13/10/494)
Supplement: s1 [file s1]

## 16S rRNA gene amplicon sequencing data of the Iron Quadrangle ferruginous caves (Brazil) shows the importance of conserving this singular and threatened geosystem

**Short title:** 16S rRNA gene amplicon sequencing of ferruginous caves

Camila Gracyelle de Carvalho Lemes<sup>1</sup>, Morghana Marina Villa<sup>2</sup>, Érica Barbosa Felestrino<sup>1</sup>, Luiza Oliveira Perucci<sup>3</sup>, Renata Almeida Barbosa Assis<sup>1</sup>, Isabella Ferreira Cordeiro<sup>1</sup>, Natasha Peixoto Fonseca<sup>1</sup>, Lara Chaves Carvalho Guerra<sup>2</sup>, Washington Luiz Caneschi<sup>1</sup>, Lauro Ângelo Gonçalves de Moraes<sup>4</sup>, Flávio Fonseca do Carmo<sup>5</sup>, Luciana Hiromi Yoshino Kamino<sup>5</sup>, Pedro Navarro Cardoso Vale<sup>6</sup>, Suzana Eiko Sato Guima<sup>7</sup>, João Carlos Setubal<sup>7</sup>, André Augusto Rodrigues Salgado<sup>6</sup>, Leandro Marcio Moreira<sup>1,2#</sup>.

### Supplementary Table S5. Features of the genera found on the floor, ceiling, and biofilm hanging from the ceiling of cave 2 in Chapada de Canga.

| Genus                   | Point | Metabolism                | pH                      | Respiration                            | Temperature                   | Feature                                                                               | Ref          |
|-------------------------|-------|---------------------------|-------------------------|----------------------------------------|-------------------------------|---------------------------------------------------------------------------------------|--------------|
| <i>Acidipila</i>        | F+C   | Chemo-organotrophic       | Acidophilic             | Aerobic                                | Mesophilic                    |                                                                                       | <sup>1</sup> |
| <i>Acidisoma</i>        | F+C   | Chemo-organotrophic       | Acidophilic             | Aerobic                                | Psychrotolerant               | Oxidase and catalase-positive                                                         | <sup>2</sup> |
| <i>Aciditerrimonas</i>  | F+C+S | Facultatively autotrophic | Thermoacidophilic       | Facultatively anaerobic                | Thermophile                   | Capable of reducing ferric iron. Related to natural products production               | <sup>3</sup> |
| <i>Actinoallomurus</i>  | F+C+S |                           | Acidophilic             | Strictly aerobic                       | Mesophilic                    | Potential to produce metabolites arising from different biosynthetic pathways.        | <sup>4</sup> |
| <i>Aminomonas</i>       | F+C   |                           | Neutrophilic            | Strictly anaerobic                     | Mesophilic                    | Grows by utilizing amino acids only in the presence of yeast extract                  | <sup>5</sup> |
| <i>Anaeromyxobacter</i> | S     |                           | Neutrophilic            | Facultative anaerobic                  | Mesophilic                    | Acetate, succinate, pyruvate, formate, and H <sub>2</sub> are used as electron donors | <sup>6</sup> |
| <i>Aquisphaera</i>      | F     | Chemoheterotrophic        | Neutrophilic            | Strictly aerobic                       | Mesophilic                    | Catalase and cytochrome oxidase-positiv                                               | <sup>7</sup> |
| <i>Bacillus</i>         | F+C   |                           | Acidophilic/Alkaliphils | Obligate aerobes/facultative anaerobes | Psychophiles to Thermophiles; | Most catalase positive                                                                | <sup>8</sup> |

|                              |       |                                 |              |                                         |                         |                                                                                                                                                                                                                           |    |
|------------------------------|-------|---------------------------------|--------------|-----------------------------------------|-------------------------|---------------------------------------------------------------------------------------------------------------------------------------------------------------------------------------------------------------------------|----|
| <i>Bdellovibrio</i>          | S     |                                 |              | Obligate aerobic                        |                         | Parasites of other bacteria and kill other gram negative bacteria                                                                                                                                                         | 9  |
| <i>Blastochloris</i>         | F     | Heterotroph or photoheterotroph | Acidophilic  | Faculative anaerobe                     | Mesophilic              | Unique due to the presence of bacteriochlorophyll (BChl)b                                                                                                                                                                 | 10 |
| <i>Bradyrhizobium</i>        | F+C+S |                                 | Acidophilic  | Strictly aerobic                        | Mesophilic              | Take atmospheric nitrogen and fix it into ammonia (NH <sub>3</sub> ) or ammonium (NH <sub>4</sub> <sup>+</sup> )                                                                                                          | 11 |
| <i>Burkholderia</i>          | F     |                                 | Acidophilic  | Obligately aerobic                      | Mesophilic              | Saprophytic species or opportunistic pathogens that infect animals, humans and plants; Several <i>Burkholderia</i> species are now being utilized in industrial applications as biocatalysts, for biodegradation and PGPR | 12 |
| <i>Candidatus Solibacter</i> | F+S   | Chemoorganotrophic              | Acidophilic  | Aerobic                                 | Mesophilic temperatures | It produces enzymes to breaking down organic carbon available in its environment for metabolism and participates in nitrate and nitrite reduction                                                                         | 13 |
| <i>Chitinimonas</i>          | F     |                                 | Acidophilic  | Aerobic and anaerobic                   | Mesophilic              | Chitinolytic                                                                                                                                                                                                              | 14 |
| <i>Conexibacter</i>          | F+C   | Chemoorganotrophs               | Neutrophilic | <a href="#">Aerobic</a>                 | Mesophilic              | Reduce nitrate to nitrite                                                                                                                                                                                                 | 15 |
| <i>Crossiella</i>            | C     |                                 |              | <a href="#">Aerobic.</a>                | Mesophilic              | Catalase positive                                                                                                                                                                                                         | 16 |
| <i>Dyella</i>                | F+C   |                                 | Neutrophilic | Aerobic                                 | Mesophilic              | Catalase and oxidase positive and urease-negative                                                                                                                                                                         | 17 |
| <i>Elusimicrobium</i>        | F+S   | Heterotrophic                   | Neutrophilic | Obligately anaerobic                    | Mesophilic              |                                                                                                                                                                                                                           | 18 |
| <i>Ferrovum</i>              | S     | Chemolitho-autotrophic          | Acidophilic  | Obligately <i>aerobic</i>               | Psychrotolerant         | Iron-oxidizing                                                                                                                                                                                                            | 19 |
| <i>Ferruginibacter</i>       | F+S   |                                 | Neutrophilic | Strictly aerobic                        | Mesophilic              |                                                                                                                                                                                                                           | 20 |
| <i>Gemmata</i>               | F+C   | <a href="#">Heterotrophic,</a>  |              | <a href="#">Aerobic</a>                 |                         |                                                                                                                                                                                                                           | 21 |
| <i>Gemmatimonas</i>          | F+C   |                                 | Neutrophilic | Aerobic or micro-oxic conditions        | Mesophilic              |                                                                                                                                                                                                                           | 22 |
| <i>Geobacter</i>             | S     | Chemo-organotroph               | Neutrophilic | Anaerobic respiration                   | Mesophilic              | Useful in bioremediation; ability to reduce organic compounds and metals, including iron, radioactive metals                                                                                                              | 23 |
| <i>Georgfuchsia</i>          | F+S   | Chemo-organoheterotrophic       | Neutrophilic | Strictly respiratory type of metabolism | Mesophilic              | Capability to degrade aromatic compounds                                                                                                                                                                                  | 24 |
| <i>Granulicella</i>          | F+C   | Chemo-organotrophs              | Acidophilic  | Aerobic                                 | Mesophilic              | Produce amorphous extracellular polysaccharide-like substance                                                                                                                                                             | 25 |

|                              |       |                                                       |                       |                                             |                                           |                                                                                                                                              |    |
|------------------------------|-------|-------------------------------------------------------|-----------------------|---------------------------------------------|-------------------------------------------|----------------------------------------------------------------------------------------------------------------------------------------------|----|
| <i>Haliangium</i>            | F+S   |                                                       |                       | Obligate aerobic and moderately halophilic, | Mesophile                                 |                                                                                                                                              | 26 |
| <i>Iamia</i>                 | C     |                                                       | Neutrophilic          | Obligate aerobic                            | Mesophile                                 |                                                                                                                                              | 27 |
| <i>Jahnella</i>              | F+S   |                                                       |                       |                                             | Mesophile                                 |                                                                                                                                              | 28 |
| <i>Ktedonobacter</i>         | F+C+S | Heterotrophic                                         | Acidophilic           | Aerobic                                     | Mesophilic                                |                                                                                                                                              | 29 |
| <i>Lysinibacillus</i>        | F     |                                                       | Neutrophilic          | Obligate aerobe                             | Mesophilic                                |                                                                                                                                              | 30 |
| <i>Methanomassiliicoccus</i> | F+S   |                                                       | Slightly alkaliphilic | Obligatory anaerobic                        | Mesophilic                                | Archaea                                                                                                                                      | 31 |
| <i>Methylocapsa</i>          | C     |                                                       | Acidophilic           | Strictly aerobic                            | Mesophilic                                | Capable of atmospheric nitrogen fixation                                                                                                     | 32 |
| <i>Methylocystis</i>         | C     | Chemolithotroph                                       | Cidophilic            | Aerobic                                     | Mesophilic                                | Facultatively methanotrophic                                                                                                                 | 33 |
| <i>Mucilaginibacter</i>      | F     | Chemo-organotrophic                                   | Acidophilic           | Facultative aerobes                         | Mesophilic                                |                                                                                                                                              | 34 |
| <i>Mycobacterium</i>         | F+C   |                                                       |                       | Aerobic                                     | Mesophilic                                |                                                                                                                                              | 35 |
| <i>Nitrospira</i>            | F+S   | Chemolithoautotrophic                                 | Alkaliphilic          |                                             | Mesophilic                                | Nitrite-oxidizing bacteria                                                                                                                   | 36 |
| <i>Novosphingobium</i>       | F+S   |                                                       | Alkaliphilic          | Facultative anaerobic                       | Mesophilic                                |                                                                                                                                              | 37 |
| <i>Ohtaekwangia</i>          | F     |                                                       | Acidophilic           | Strictly aerobic                            | Mesophilic                                |                                                                                                                                              | 38 |
| <i>Oxalophagus</i>           | F     |                                                       |                       | Anaerobic                                   | Mesophilic                                |                                                                                                                                              | 39 |
| <i>Pedomicrobium</i>         | F+S   |                                                       | Acidophilic           |                                             | Mesophilic                                | Abilities to oxidise manganese (Mn)                                                                                                          | 40 |
| <i>Phenylobacterium</i>      | F+S   | Chemoorganotrophic                                    | Alkaliphilic          | Strictly aerobic                            | Mesophilic                                |                                                                                                                                              | 41 |
| <i>Planctomyces</i>          | F+S   | Chemoorganotroph                                      |                       | Facultative aerobic                         | Mesophilic                                |                                                                                                                                              | 42 |
| <i>Propionibacterium</i>     | C     | Chemoorganotrophic                                    |                       | Anaerobic/facultatively aerobic             | Mesophilic                                | Widely used in the production of vitamin B12, tetrapyrrole compounds, and propionic acid, as well as in the probiotics and cheese industries | 43 |
| <i>Pseudonocardia</i>        | C     | Facultative autotrophs                                |                       | Aerobic                                     | Mesophilic                                |                                                                                                                                              | 44 |
| <i>Rhizomicrobium</i>        | F+C+S |                                                       | Acidophilic           | Facultatively anaerobic.                    | Mesophilic                                | Reduces Fe(III) o Fe(II) in the presence of glucose                                                                                          | 45 |
| <i>Rhodanobacter</i>         | F     |                                                       | Acidophilic           | Facultatively anaerobic                     | Mesophilic                                | Bioremediation                                                                                                                               | 46 |
| <i>Rhodomicrobium</i>        | F+C+S | Photo-organoheterotrophy and chemo-organoheterotrophy | Acidophilic           | Microaerobic to anaerobic                   | Psychrotolerant                           |                                                                                                                                              | 47 |
| <i>Rhodoplanes</i>           | F+C+S | Phototrophic                                          | Acidophilic           | Anaerobic                                   | Mesophilic, neutrophic, and nonhalophilic | Denitrification positive                                                                                                                     | 48 |
| <i>Sideroxydans</i>          | S     | Autotrophic                                           | Acidophilic           | Microaerophilic                             | Psychrotolerant                           | Iron-oxidizing                                                                                                                               | 49 |
| <i>Skermanella</i>           | S     | Chemo-organotroph                                     | Acidophilic           | strictly aerobic                            | Mesophilic                                |                                                                                                                                              | 50 |

|                           |       |                     |              |                                          |                 |                                                                                                                                                                                           |    |
|---------------------------|-------|---------------------|--------------|------------------------------------------|-----------------|-------------------------------------------------------------------------------------------------------------------------------------------------------------------------------------------|----|
| <i>Stenoxybacter</i>      | C     |                     |              | Strict aerobe obligate microaerophile    | Mesophilic      |                                                                                                                                                                                           | 51 |
| <i>Steroidobacter</i>     | F+C+S | Chemo-organotrophs  | Acidophilic  | Anaerobe or aerobe                       | Mesophilic      | Exhibit reduction of nitrate to dinitrogen monoxide and further to dinitrogen without any intermediate accumulation of nitrite.                                                           | 52 |
| <i>Streptacidiphilus</i>  | C     | Chemo-organotrophic | Acidophilic  | Aerobic                                  | Mesophilic      | Turnover of organic matter in acidic habitats. Also reported to be potential producers of antifungal compounds and acid-stable enzymes.                                                   | 53 |
| <i>Telmatobacter</i>      | F+S   | Chemo-organotrophic | Acidophile   | Facultatively anaerobic                  | Psychrotolerant |                                                                                                                                                                                           | 54 |
| <i>Thermogemmatispora</i> | F+C   | Heterotrophs        | Acidophile   | Aerobic                                  | Thermophilic    |                                                                                                                                                                                           | 55 |
| <i>Thermosporothrix</i>   | F+C   | Heterotrophic       | Neutrophilic | Aerobic                                  | Thermophilic    |                                                                                                                                                                                           | 56 |
| <i>Vampirovibrio</i>      | F+S   |                     |              | Obligate aerobic and epibiotic parasitic | Mesophilic      | Is one of the few known predatory bacteria, an obligate parasite                                                                                                                          | 57 |
| <i>Variovorax</i>         | F     | Chemo-organotrophic | Neutrophilic | Anaerobic                                | Mesophilic      | Diverse metabolic capabilities enable it to degrade a wide array of recalcitrant organic pollutants including 2,4-dinitrotoluene, aliphatic polycarbonates and polychlorinated biphenyls. | 58 |
| <i>Zavarzinella</i>       | F+C   | Chemo-organotrophic | Acidophile   | Aerobic                                  | Mesophilic      | Catalase- and cytochrome oxidase-positive                                                                                                                                                 | 59 |

F – Floor; C – Ceiling; S – Speleothem.

## References

- 1 Okamura, K., Kawai, A., Yamada, T. & Hiraishi, A. *Acidipila rosea* gen. nov., sp. nov., an acidophilic chemoorganotrophic bacterium belonging to the phylum Acidobacteria. *FEMS Microbiol Lett.* **317**, 138-142. <https://doi.org/10.1111/j.1574-6968.2011.02224.x> (2011).
- 2 Belova, S. E., Pankratov, T. A., Detkova, E. N., Kaparullina, E. N. & Dedysh, S. N. *Acidisoma tundrae* gen. nov., sp. nov. and *Acidisoma sibiricum* sp. nov., two acidophilic, psychrotolerant members of the Alphaproteobacteria from acidic northern wetlands. *Int J Syst Evol Microbiol.* **59**, 2283-2290. <https://doi.org/10.1099/ijs.0.009209-0> (2009).
- 3 Itoh, T., Yamanoi, K., Kudo, T., Ohkuma, M. & Takashina, T. *Aciditerrimonas ferrireducens* gen. nov., sp. nov., an iron-reducing thermoacidophilic actinobacterium isolated from a solfataric field. *Int J Syst Evol Microbiol.* **61**, 1281-1285. <https://doi.org/10.1099/ijs.0.023044-0> (2011).
- 4 Tamura, T., Ishida, Y., Nozawa, Y., Otaguro, M. & Suzuki, K.-i. Transfer of *Actinomadura spadix* Nonomura and Ohara 1971 to *Actinoallomurus spadix* gen. nov., comb. nov., and description of *Actinoallomurus amamiensis* sp. nov., *Actinoallomurus caesius* sp. nov., *Actinoallomurus coprocola* sp. nov., *Actinoallomurus fulvus* sp. nov., *Actinoallomurus iriomotensis* sp. nov., *Actinoallomurus luridus* sp. nov., *Actinoallomurus purpureus* sp. nov. and *Actinoallomurus yoronensis* sp. nov. *Int J Syst Evol Microbiol.* **59**, 1867-1874. <https://doi.org/10.1099/ijs.0.006858-0> (2009).
- 5 Baena, S. *et al.* *Aminomonas paucivorans* gen. nov., sp. nov., a mesophilic, anaerobic, amino-acid-utilizing bacterium. *Int J Syst Evol Microbiol.* **49**, 975-982. <https://doi.org/10.1099/00207713-49-3-975> (1999).
- 6 Sanford, R. A., Cole, J. R. & Tiedje, J. M. Characterization and description of *Anaeromyxobacter dehalogenans* gen. nov., sp. nov., an aryl-halo-respiring facultative anaerobic myxobacterium. *Appl Environ Microbiol.* **68**, 893-900. <https://doi.org/10.1128/aem.68.2.893-900.2002> (2002).
- 7 Bondoso, J. *et al.* *Aquisphaera giovannonii* gen. nov., sp. nov., a planctomycete isolated from a freshwater aquarium. *Int J Syst Evol Microbiol.* **61**, 2844-2850. <https://doi.org/10.1099/ijs.0.027474-0> (2011).
- 8 Checinska, A., Paszczynski, A. & Burbank, M. Bacillus and Other Spore-Forming Genera: Variations in Responses and Mechanisms for Survival. *Annual Review of Food Science and Technology.* **6**, 351-369. <https://doi.org/10.1146/annurev-food-030713-092332> (2015).
- 9 Markelova, N. Y. Predacious bacteria, Bdellovibrio with potential for biocontrol. *Int J Hyg Environ Health.* **213**, 428-431. <https://doi.org/10.1016/j.ijheh.2010.08.004> (2010).
- 10 Hiraishi, A. Transfer of the Bacteriochlorophyll b-Containing Phototrophic Bacteria *Rhodopseudomonas viridis* and *Rhodopseudomonas sulfoviridis* to the Genus Blastochloris gen. nov. *Int J Syst Evol Microbiol.* **47**, 217-219. <https://doi.org/10.1099/00207713-47-1-217> (1997).
- 11 Okubo, T. *et al.* Complete genome sequence of *Bradyrhizobium* sp. S23321: insights into symbiosis evolution in soil oligotrophs. *Microbes Environ.* **27**, 306-315. <https://doi.org/10.1264/jsme2.me11321> (2012).
- 12 Dance, D. A. Ecology of *Burkholderia pseudomallei* and the interactions between environmental *Burkholderia* spp. and human-animal hosts. *Acta Trop.* **74**, 159-168. [https://doi.org/10.1016/s0001-706x\(99\)00066-2](https://doi.org/10.1016/s0001-706x(99)00066-2) (2000).
- 13 Wu, L.-s., Nie, Y.-y., Yang, Z.-r. & Zhang, J. Responses of soil inhabiting nitrogen-cycling microbial communities to wetland degradation on the Zoige Plateau, China. *Journal of Mountain Science.* **13**, 2192-2204. <https://doi.org/10.1007/s11629-016-4004-5> (2016).
- 14 Chang, S. C. *et al.* *Chitinimonas taiwanensis* gen. nov., sp. nov., a novel chitinolytic bacterium isolated from a freshwater pond for shrimp culture. *Syst Appl Microbiol.* **27**, 43-49. <https://doi.org/10.1078/0723-2020-00252> (2004).

- 15 Monciardini, P., Cavaletti, L., Schumann, P., Rohde, M. & Donadio, S. *Conexibacter woesei* gen. nov., sp. nov., a novel representative of a deep evolutionary line of descent within the class Actinobacteria. *Int J Syst Evol Microbiol.* **53**, 569-576. <https://doi.org/10.1099/ij.s.0.02400-0> (2003).
- 16 Labeda, D. P. *Crossiella* gen. nov., a new genus related to *Streptoalloteichus*. *Int J Syst Evol Microbiol.* **51**, 1575-1579. <https://doi.org/10.1099/00207713-51-4-1575> (2001).
- 17 Xie, C. H. & Yokota, A. *Dyella japonica* gen. nov., sp. nov., a gamma-proteobacterium isolated from soil. *Int J Syst Evol Microbiol.* **55**, 753-756. <https://doi.org/10.1099/ij.s.0.63377-0> (2005).
- 18 Geissinger, O., Herlemann, D. P., Morschel, E., Maier, U. G. & Brune, A. The ultramicrobacterium "*Elusimicrobium minutum*" gen. nov., sp. nov., the first cultivated representative of the termite group 1 phylum. *Appl Environ Microbiol.* **75**, 2831-2840. <https://doi.org/10.1128/AEM.02697-08> (2009).
- 19 Johnson, D. B., Hallberg, K. B. & Hedrich, S. Uncovering a microbial enigma: isolation and characterization of the streamer-generating, iron-oxidizing, acidophilic bacterium "*Ferrovum myxofaciens*". *Appl Environ Microbiol.* **80**, 672-680. <https://doi.org/10.1128/AEM.03230-13> (2014).
- 20 Lim, J. H., Baek, S. H. & Lee, S. T. *Ferruginibacter alkalilentus* gen. nov., sp. nov. and *Ferruginibacter lapsinensis* sp. nov., novel members of the family 'Chitinophagaceae' in the phylum Bacteroidetes, isolated from freshwater sediment. *Int J Syst Evol Microbiol.* **59**, 2394-2399. <https://doi.org/10.1099/ij.s.0.009480-0> (2009).
- 21 Franzmann, P. D. & Skerman, V. B. D. *Gemmata obscuriglobus*, a new genus and species of the budding bacteria. *Antonie Van Leeuwenhoek.* **50**, 261-268. <https://doi.org/10.1007/BF02342136> (1984).
- 22 Zhang, H. *et al.* *Gemmatimonas aurantiaca* gen. nov., sp. nov., a gram-negative, aerobic, polyphosphate-accumulating micro-organism, the first cultured representative of the new bacterial phylum Gemmatimonadetes phyl. nov. *Int J Syst Evol Microbiol.* **53**, 1155-1163. <https://doi.org/10.1099/ij.s.0.02520-0> (2003).
- 23 Lovley, D. R. *et al.* *Geobacter metallireducens* gen. nov. sp. nov., a microorganism capable of coupling the complete oxidation of organic compounds to the reduction of iron and other metals. *Arch Microbiol.* **159**, 336-344. <https://doi.org/10.1007/BF00290916> (1993).
- 24 Weelink, S. A. B. *et al.* A strictly anaerobic betaproteobacterium *Georgfuchsia toluolica* gen. nov., sp. nov. degrades aromatic compounds with Fe(III), Mn(IV) or nitrate as an electron acceptor. *FEMS Microbiol Ecol.* **70**, 575-585. <https://doi.org/10.1111/j.1574-6941.2009.00778.x> (2009).
- 25 Pankratov, T. & Dedysh, S. *Granulicella paludicola* gen. nov., sp. nov., *G. pectinivorans* sp. nov., *G. aggregans* sp. nov. and *G. rosea* sp. nov., novel acidophilic, polymer-degrading Acidobacteria from Sphagnum peat bogs. *Int J Syst Evol Microbiol.* **60**, 2951-2959. <https://doi.org/10.1099/ij.s.0.021824-0> (2010).
- 26 Fudou, R., Jojima, Y., Iizuka, T. & Yamanaka, S. *Haliangium ochraceum* gen. nov., sp. nov. and *Haliangium tepidum* sp. nov.: Novel moderately halophilic myxobacteria isolated from coastal saline environments. *The Journal of general and applied microbiology.* **48**, 109-116. <https://doi.org/10.2323/jgam.48.109> (2002).
- 27 Kurahashi, M., Fukunaga, Y., Sakiyama, Y., Harayama, S. & Yokota, A. *Iamia majanohamensis* gen. nov., sp. nov., an actinobacterium isolated from sea cucumber *Holothuria edulis*, and proposal of Iamiaceae fam. nov. *Int J Syst Evol Microbiol.* **59**, 869-873. <https://doi.org/10.1099/ij.s.0.005611-0> (2009).

- 28 Garcia, R. & Müller, R. in *The Prokaryotes: Deltaproteobacteria and Epsilonproteobacteria* (eds Eugene Rosenberg *et al.*) 247-279 (Springer Berlin Heidelberg, 2014).
- 29 Cavaletti, L. *et al.* New lineage of filamentous, spore-forming, gram-positive bacteria from soil. *Appl Environ Microbiol.* **72**, 4360-4369. <https://doi.org/10.1128/AEM.00132-06> (2006).
- 30 Ahmed, I., Yokota, A., Yamazoe, A. & Fujiwara, T. Proposal of *Lysinibacillus boronitolerans* gen. nov. sp. nov., and transfer of *Bacillus fusiformis* to *Lysinibacillus fusiformis* comb. nov. and *Bacillus sphaericus* to *Lysinibacillus sphaericus* comb. nov. *Int J Syst Evol Microbiol.* **57**, 1117-1125. <https://doi.org/10.1099/ijs.0.63867-0> (2007).
- 31 Dridi, B., Fardeau, M. L., Ollivier, B., Raoult, D. & Drancourt, M. *Methanomassiliicoccus luminyensis* gen. nov., sp. nov., a methanogenic archaeon isolated from human faeces. *Int J Syst Evol Microbiol.* **62**, 1902-1907. <https://doi.org/10.1099/ijs.0.033712-0> (2012).
- 32 Dedysh, S. N. *et al.* *Methylocapsa acidiphila* gen. nov., sp. nov., a novel methane-oxidizing and dinitrogen-fixing acidophilic bacterium from Sphagnum bog. *Int J Syst Evol Microbiol.* **52**, 251-261. <https://doi.org/10.1099/00207713-52-1-251> (2002).
- 33 Mills, C. T. *et al.* The relative contribution of methanotrophs to microbial communities and carbon cycling in soil overlying a coal-bed methane seep. *FEMS Microbiol Ecol.* **84**, 474-494. <https://doi.org/10.1111/1574-6941.12079> (2013).
- 34 Pankratov, T. A., Tindall, B. J., Liesack, W. & Dedysh, S. N. *Mucilaginibacter paludis* gen. nov., sp. nov. and *Mucilaginibacter gracilis* sp. nov., pectin-, xylan- and laminarin-degrading members of the family Sphingobacteriaceae from acidic Sphagnum peat bog. *Int J Syst Evol Microbiol.* **57**, 2349-2354. <https://doi.org/10.1099/ijs.0.65100-0> (2007).
- 35 Cook, G. M. *et al.* Physiology of mycobacteria. *Adv Microb Physiol.* **55**, 81-182, 318-189. [https://doi.org/10.1016/S0065-2911\(09\)05502-7](https://doi.org/10.1016/S0065-2911(09)05502-7) (2009).
- 36 Daims, H. *et al.* Complete nitrification by Nitrospira bacteria. *Nature.* **528**, 504-509. <https://doi.org/10.1038/nature16461> (2015).
- 37 Takeuchi, M., Hamana, K. & Hiraishi, A. Proposal of the genus Sphingomonas sensu stricto and three new genera, Sphingobium, Novosphingobium and Sphingopyxis, on the basis of phylogenetic and chemotaxonomic analyses. *Int J Syst Evol Microbiol.* **51**, 1405-1417. <https://doi.org/10.1099/00207713-51-4-1405> (2001).
- 38 Yoon, J. H., Kang, S. J., Lee, S. Y., Lee, J. S. & Park, S. *Ohtaekwangia koreensis* gen. nov., sp. nov. and *Ohtaekwangia kribbensis* sp. nov., isolated from marine sand, deep-branching members of the phylum Bacteroidetes. *Int J Syst Evol Microbiol.* **61**, 1066-1072. <https://doi.org/10.1099/ijs.0.025874-0> (2011).
- 39 Collins, M. D. *et al.* The phylogeny of the genus Clostridium: proposal of five new genera and eleven new species combinations. *Int J Syst Bacteriol.* **44**, 812-826. <https://doi.org/10.1099/00207713-44-4-812> (1994).
- 40 Gebers, R. & Beese, M. *Pedomicrobium americanum* sp. nov. and *Pedomicrobium australicum* sp. nov. from Aquatic Habitats, *Pedomicrobium* gen. emend., and *Pedomicrobium ferrugineum* sp. emend. *Int J Syst Evol Microbiol.* **38**, 303-315. <https://doi.org/10.1099/00207713-38-3-303> (1988).
- 41 Eberspächer, J. in *Bergey's Manual of Systematics of Archaea and Bacteria* (eds W.B. Whitman *et al.*) 1-12 (2015).
- 42 Jogler, C., Glockner, F. O. & Kolter, R. Characterization of *Planctomyces limnophilus* and development of genetic tools for its manipulation establish it as a model species for the phylum Planctomycetes. *Appl Environ Microbiol.* **77**, 5826-5829. <https://doi.org/10.1128/AEM.05132-11> (2011).

- 43 Kiatpapan, P. & Murooka, Y. Genetic manipulation system in propionibacteria. *J Biosci Bioeng.* **93**, 1-8 (2002).
- 44 Grostern, A. & Alvarez-Cohen, L. RubisCO-based CO<sub>2</sub> fixation and C1 metabolism in the actinobacterium *Pseudonocardia dioxanivorans* CB1190. *Environ Microbiol.* **15**, 3040-3053. <https://doi.org/10.1111/1462-2920.12144> (2013).
- 45 Ueki, A. *et al.* *Rhizomicrobium palustre* gen. nov., sp. nov., a facultatively anaerobic, fermentative stalked bacterium in the class Alphaproteobacteria isolated from rice plant roots. *J Gen Appl Microbiol.* **56**, 193-203. <https://doi.org/10.2323/jgam.56.193> (2010).
- 46 Nalin, R., Simonet, P., Vogel, T. M. & Normand, P. *Rhodanobacter lindaniclasticus* gen. nov., sp. nov., a lindane-degrading bacterium. *Int J Syst Bacteriol.* **49 Pt 1**, 19-23. <https://doi.org/10.1099/00207713-49-1-19> (1999).
- 47 Ramana, V. V., Raj, P. S., Tushar, L., Sasikala, C. & Ramana Ch, V. *Rhodomicrobium udaipurens* sp. nov., a psychrotolerant, phototrophic alphaproteobacterium isolated from a freshwater stream. *Int J Syst Evol Microbiol.* **63**, 2684-2689. <https://doi.org/10.1099/ij.s.0.046409-0> (2013).
- 48 Hiraishi, A. & Ueda, Y. *Rhodoplanes* gen. nov., a New Genus of Phototrophic Bacteria Including *Rhodopseudomonas rosea* as *Rhodoplanes roseus* comb. nov. and *Rhodoplanes elegans* sp. nov. *Int J Syst Evol Microbiol.* **44**, 665-673. <https://doi.org/10.1099/00207713-44-4-665> (1994).
- 49 Lüdecke, C., Reiche, M., Eusterhues, K., Nietzsche, S. & Küsel, K. Acid-tolerant microaerophilic Fe(II)-oxidizing bacteria promote Fe(III)-accumulation in a fen. *Environ Microbiol.* **12**, 2814-2825. <https://doi.org/10.1111/j.1462-2920.2010.02251.x> (2010).
- 50 Sly, L. I. & Stackebrandt, E. Description of *Skermanella parooensis* gen. nov., sp. nov. to accommodate *Conglomeromonas largomobilis* subsp. *parooensis* following the transfer of *Conglomeromonas largomobilis* subsp. *largomobilis* to the genus *Azospirillum*. *Int J Syst Evol Microbiol.* **49**, 541-544. <https://doi.org/10.1099/00207713-49-2-541> (1999).
- 51 Wertz, J. T. & Breznak, J. A. *Stenoxybacter acetivorans* gen. nov., sp. nov., an acetate-oxidizing obligate microaerophile among diverse O<sub>2</sub>-consuming bacteria from termite guts. *Appl Environ Microbiol.* **73**, 6819-6828. <https://doi.org/10.1128/AEM.00786-07> (2007).
- 52 Sakai, M., Hosoda, A., Ogura, K. & Ikenaga, M. The growth of *Steroidobacter agariperforans* sp. nov., a novel agar-degrading bacterium isolated from soil, is enhanced by the diffusible metabolites produced by bacteria belonging to Rhizobiales. *Microbes Environ.* **29**, 89-95. <https://doi.org/10.1264/jsme2.me13169> (2014).
- 53 Komaki, H. *et al.* Draft genome sequences of six type strains of the genus streptacidiphilus. *Genome Announc.* **3**. <https://doi.org/10.1128/genomeA.01387-14> (2015).
- 54 Pankratov, T. A., Kirsanova, L. A., Kaparullina, E. N., Kevbrin, V. V. & Dedysh, S. N. *Telmatobacter bradus* gen. nov., sp. nov., a cellulolytic facultative anaerobe from subdivision 1 of the Acidobacteria, and emended description of *Acidobacterium capsulatum* Kishimoto *et al.* 1991. *Int J Syst Evol Microbiol.* **62**, 430-437. <https://doi.org/10.1099/ij.s.0.029629-0> (2012).
- 55 Yabe, S., Aiba, Y., Sakai, Y., Hazaka, M. & Yokota, A. *Thermogemmatispora onikobensis* gen. nov., sp. nov. and *Thermogemmatispora foliorum* sp. nov., isolated from fallen leaves on geothermal soils, and description of Thermogemmatisporaceae fam. nov. and Thermogemmatisporales ord. nov. within the class Ktedonobacteria. *Int J Syst Evol Microbiol.* **61**, 903-910. <https://doi.org/10.1099/ij.s.0.024877-0> (2011).



- 56 Yabe, S., Aiba, Y., Sakai, Y., Hazaka, M. & Yokota, A. *Thermosporothrix hazakensis* gen. nov., sp. nov., isolated from compost, description of Thermosporotrichaceae fam. nov. within the class Ktedonobacteria Cavaletti et al. 2007 and emended description of the class Ktedonobacteria. *Int J Syst Evol Microbiol.* **60**, 1794-1801. <https://doi.org/10.1099/ijs.0.018069-0> (2010).
- 57 Lehman, M. & Williams, H. in *Bergey's Manual of Systematics of Archaea and Bacteria* (eds M.E. Trujillo et al.) (2015).
- 58 Willems, A., Ley, J., Gillis, M. & Kersters, K. Comamonadaceae, a New Family Encompassing the Acidovorans rRNA Complex, Including *Variovorax paradoxus* gen. nov. , comb. nov. for *Alcaligenes paradoxus* (Davis 1969). *Int J Syst Bacteriol.* **41**. <https://doi.org/10.1099/00207713-41-3-445> (1991).
- 59 Kulichevskaya, I. S. et al. *Zavarzinella formosa* gen. nov., sp. nov., a novel stalked, Gemmata-like planctomycete from a Siberian peat bog. *Int J Syst Evol Microbiol.* **59**, 357-364. <https://doi.org/10.1099/ijs.0.002378-0> (2009).
