# Supplementary material
Source: MDPI journal article supplement (https://www.mdpi.com/1424-2818/13/10/494)
Supplement: s1 [file s1]

**16S rRNA gene amplicon sequencing data of the Iron Quadrangle ferruginous caves (Brazil) shows the importance of conserving this singular and threatened geosystem**

**Short title:** 16S rRNA gene amplicon sequencing of ferruginous caves

Camila Gracyelle de Carvalho Lemes<sup>1</sup>, Morghana Marina Villa<sup>2</sup>, Érica Barbosa Felestrino<sup>1</sup>, Luiza Oliveira Perucci<sup>3</sup>, Renata Almeida Barbosa Assis<sup>1</sup>, Isabella Ferreira Cordeiro<sup>1</sup>, Natasha Peixoto Fonseca<sup>1</sup>, Lara Chaves Carvalho Guerra<sup>2</sup>, Washington Luiz Caneschi<sup>1</sup>, Lauro Ângelo Gonçalves de Moraes<sup>4</sup>, Flávio Fonseca do Carmo<sup>5</sup>, Luciana Hiromi Yoshino Kamino<sup>5</sup>, Pedro Navarro Cardoso Vale<sup>6</sup>, Suzana Eiko Sato Guima<sup>7</sup>, João Carlos Setubal<sup>7</sup>, André Augusto Rodrigues Salgado<sup>6</sup>, Leandro Marcio Moreira<sup>1,2#</sup>.

**Supplementary Table S3. The most abundant OTUs by sample and the unique OTUs by cave**

| # | Sample | Cave | Collection place | Barcode    | 15 most abundant OTUs (Relative abundance) |                       |       | Unique OTUs by cave                            |                                                          |
|---|--------|------|------------------|------------|--------------------------------------------|-----------------------|-------|------------------------------------------------|----------------------------------------------------------|
|   |        |      |                  |            | Phylum                                     | Genus                 | %     | Phylum                                         | Genus                                                    |
| 1 | MC1F1  | 1    | Floor            | CTAAGGTAAC | Acidobacteria                              | Gp2                   | 40,58 | Bacteroidetes<br>Chloroflexi<br>Proteobacteria | Flavobacterium<br>Other<br>Bacteriovorax<br>Desulfacinum |
|   |        |      |                  |            | Acidobacteria                              | Gp1                   | 9,69  |                                                |                                                          |
|   |        |      |                  |            | Other                                      | Other (bacteria)      | 8,39  |                                                |                                                          |
|   |        |      |                  |            | Chloroflexi                                | Ktedonobacter         | 5,69  |                                                |                                                          |
|   |        |      |                  |            | Chloroflexi                                | Other                 | 3,10  |                                                |                                                          |
|   |        |      |                  |            | Chloroflexi                                | Other                 | 2,60  |                                                |                                                          |
|   |        |      |                  |            | Thaumarchaeota                             | Nitrososphaera        | 2,40  |                                                |                                                          |
|   |        |      |                  |            | Acidobacteria                              | Gp5                   | 2,30  |                                                |                                                          |
|   |        |      |                  |            | Chloroflexi                                | Other                 | 2,10  |                                                |                                                          |
|   |        |      |                  |            | Nitrospirae                                | Nitrospira            | 1,60  |                                                |                                                          |
|   |        |      |                  |            | Acidobacteria                              | Gp13                  | 1,50  |                                                |                                                          |
|   |        |      |                  |            | Acidobacteria                              | Gp3                   | 1,50  |                                                |                                                          |
|   |        |      |                  |            | Proteobacteria                             | Steroidobacter        | 1,30  |                                                |                                                          |
|   |        |      |                  |            | Acidobacteria                              | Candidatus Koribacter | 1,10  |                                                |                                                          |
|   |        |      |                  |            | Chloroflexi                                | Thermosporothrix      | 1,0   |                                                |                                                          |
| 2 | MC1F2  | 1    | Floor            | TAAGGAGAAC | Acidobacteria                              | Gp2                   | 34,46 |                                                |                                                          |
|   |        |      |                  |            | Acidobacteria                              | Gp1                   | 10,28 |                                                |                                                          |
|   |        |      |                  |            | Other                                      | Other                 | 8,39  |                                                |                                                          |
|   |        |      |                  |            | Chloroflexi                                | Ktedonobacter         | 6,69  |                                                |                                                          |
|   |        |      |                  |            | Thaumarchaeota                             | Nitrososphaera        | 3,30  |                                                |                                                          |
|   |        |      |                  |            | Chloroflexi                                | Other                 | 3,20  |                                                |                                                          |
|   |        |      |                  |            | Acidobacteria                              | Gp5                   | 2,60  |                                                |                                                          |
|   |        |      |                  |            | Chloroflexi                                | Other                 | 2,30  |                                                |                                                          |
|   |        |      |                  |            | Chloroflexi                                | Other                 | 2,20  |                                                |                                                          |
|   |        |      |                  |            | Chloroflexi                                | Other                 | 2,20  |                                                |                                                          |

|   |        |   |         |            |                                                                                                                                                                                                                                                   |                                                                                                                                                                           |                                                                                                                        |                                                                                                                                                            |                                                                                                                       |
|---|--------|---|---------|------------|---------------------------------------------------------------------------------------------------------------------------------------------------------------------------------------------------------------------------------------------------|---------------------------------------------------------------------------------------------------------------------------------------------------------------------------|------------------------------------------------------------------------------------------------------------------------|------------------------------------------------------------------------------------------------------------------------------------------------------------|-----------------------------------------------------------------------------------------------------------------------|
|   |        |   |         |            | Acidobacteria<br>Acidobacteria<br>Chloroflexi<br>Nitrospirae<br>Acidobacteria<br>Proteobacteria                                                                                                                                                   | Gp3<br>Candidatus Koribacter<br>Thermosporothrix<br>Nitrospira<br>Gp13<br>Steroidobacter                                                                                  | 2,10<br>2,10<br>1,30<br>1,20<br>1,10<br>1,10                                                                           |                                                                                                                                                            |                                                                                                                       |
| 3 | MC1C1  | 1 | Ceiling | AAGAGGATTC | Acidobacteria<br>Thaumarchaeota<br>Chloroflexi<br>Other<br>Nitrospirae<br>Acidobacteria<br>Chloroflexi<br>Proteobacteria<br>Acidobacteria<br>Acidobacteria<br>Acidobacteria<br>Acidobacteria<br>Proteobacteria<br>Chloroflexi<br>Proteobacteria   | Gp2<br>Nitrososphaera<br>Ktedonobacter<br>Other<br>Nitrospira<br>Gp1<br>Other<br>Other<br>Gp3<br>Gp5<br>Candidatus Koribacter<br>Gp13<br>Other<br>Other<br>Steroidobacter | 31,68<br>10,58<br>8,99<br>7,10<br>6,10<br>4,40<br>3,60<br>3,60<br>1,70<br>1,40<br>1,30<br>1,30<br>1,20<br>1,10<br>0,80 |                                                                                                                                                            |                                                                                                                       |
| 4 | MC1C2  | 1 | Ceiling | TACCAAGATC | Acidobacteria<br>Other<br>Thaumarchaeota<br>Nitrospirae<br>Chloroflexi<br>Acidobacteria<br>Acidobacteria<br>Actinobacteria<br>Chloroflexi<br>Chloroflexi<br>Proteobacteria<br>Proteobacteria<br>Acidobacteria<br>Proteobacteria<br>Proteobacteria | Gp2<br>Other<br>Nitrososphaera<br>Nitrospira<br>Ktedonobacter<br>Gp1<br>Gp13<br>Other<br>Other<br>Other<br>Other<br>Other<br>Gp3<br>Steroidobacter<br>Other               | 29,38<br>11,28<br>9,49<br>8,89<br>7,48<br>4,40<br>2,30<br>2,30<br>1,60<br>1,50<br>1,30<br>1,30<br>1,20<br>1,10<br>1,00 |                                                                                                                                                            |                                                                                                                       |
| 5 | MC2F1A | 2 | Floor   | CAGAAGGAAC | Acidobacteria<br>Acidobacteria<br>Chloroflexi<br>Acidobacteria<br>Other<br>Thaumarchaeota<br>Acidobacteria<br>Chloroflexi<br>Chloroflexi                                                                                                          | Gp2<br>Gp1<br>Ktedonobacter<br>Gp3<br>Other<br>Nitrososphaera<br>Gp13<br>Thermogemmatispora<br>Other                                                                      | 17,18<br>15,09<br>7,10<br>7,00<br>5,70<br>5,50<br>5,40<br>2,80<br>2,60                                                 | Thaumarchaeota<br>Firmicutes<br>Planctomycetes<br>Proteobacteria<br>Proteobacteria<br>Proteobacteria<br>Proteobacteria<br>Proteobacteria<br>Proteobacteria | Other<br>Other<br>Aquisphaera<br>Other<br>Methylocystis<br>Skermanella<br>Novosphingobium<br>Ferrovum<br>Sideroxydans |

|   |        |   |         |            |                                                                                                                                                                                                                                                    |                                                                                                                                                                                                                     |                                                                                                                         |                                  |                          |
|---|--------|---|---------|------------|----------------------------------------------------------------------------------------------------------------------------------------------------------------------------------------------------------------------------------------------------|---------------------------------------------------------------------------------------------------------------------------------------------------------------------------------------------------------------------|-------------------------------------------------------------------------------------------------------------------------|----------------------------------|--------------------------|
|   |        |   |         |            | Proteobacteria<br>Proteobacteria<br>Acidobacteria<br>Chloroflexi<br>Acidobacteria<br>Proteobacteria                                                                                                                                                | Rhizomicrobium<br>Other<br>Other<br>Other<br>Candidatus Solibacter<br>Rhodoplanes                                                                                                                                   | 2,30<br>2,10<br>1,50<br>1,50<br>1,40<br>1,20                                                                            | Proteobacteria<br>Proteobacteria | Georgfuchsia<br>Jahnella |
| 6 | MC2F2A | 2 | Floor   | CTGCAAGTTC | Acidobacteria<br>Acidobacteria<br>Acidobacteria<br>Chloroflexi<br>Other<br>Acidobacteria<br>Thaumarchaeota<br>Proteobacteria<br>Chloroflexi<br>Proteobacteria<br>Chloroflexi<br>Proteobacteria<br>Acidobacteria<br>Acidobacteria<br>Actinobacteria | Gp1<br>Gp2<br>Gp3<br>Ktedonobacter<br>Other<br>Gp13<br>Nitrososphaera<br>Other<br>Other<br>Rhodoplanes<br>Thermogemmatispora<br>Rhizomicrobium<br>Candidatus Solibacter<br>Candidatus Koribacter<br>Actinoallomurus | 17,08<br>15,18<br>10,18<br>7,50<br>3,90<br>3,20<br>3,00<br>3,00<br>2,70<br>1,90<br>1,70<br>1,70<br>1,70<br>1,60<br>1,50 |                                  |                          |
| 7 | MC2C1A | 2 | Ceiling | TTCGTGATTC | Actinobacteria<br>Chloroflexi<br>Chloroflexi<br>Other<br>Actinobacteria<br>Chloroflexi<br>Acidobacteria<br>Acidobacteria<br>Acidobacteria<br>Acidobacteria<br>Actinobacteria<br>Chloroflexi<br>Proteobacteria<br>Acidobacteria<br>Actinobacteria   | Other<br>Thermosporothrix<br>Ktedonobacter<br>Other<br>Other<br>Other<br>Gp2<br>Gp13<br>Gp3<br>Acidipila<br>Crossiella<br>Other<br>Acidisoma<br>Gp1<br>Conexibacter                                                 | 40,76<br>8,78<br>6,18<br>5,50<br>5,20<br>4,30<br>3,60<br>2,10<br>2,00<br>2,00<br>1,90<br>1,50<br>1,30<br>1,20<br>1,20   |                                  |                          |
| 8 | MC2C2A | 2 | Ceiling | TTCCGATAAC | Chloroflexi<br>Actinobacteria<br>Acidobacteria<br>Other<br>Firmicutes<br>Acidobacteria<br>Acidobacteria<br>Acidobacteria<br>Actinobacteria                                                                                                         | Ktedonobacter<br>Other<br>Other<br>Other<br>Other<br>Gp1<br>Gp2<br>Acidipila<br>Other                                                                                                                               | 18,78<br>16,38<br>7,60<br>5,00<br>4,70<br>4,40<br>4,00<br>3,80<br>3,20                                                  |                                  |                          |

|    |       |   |         |            |                                                                                                                                                                                                                                                         |                                                                                                                                                                                    |                                                                                                                         |                                                                                                                                                     |                                                                                                                                     |
|----|-------|---|---------|------------|---------------------------------------------------------------------------------------------------------------------------------------------------------------------------------------------------------------------------------------------------------|------------------------------------------------------------------------------------------------------------------------------------------------------------------------------------|-------------------------------------------------------------------------------------------------------------------------|-----------------------------------------------------------------------------------------------------------------------------------------------------|-------------------------------------------------------------------------------------------------------------------------------------|
|    |       |   |         |            | Proteobacteria<br>Actinobacteria<br>Proteobacteria<br>Actinobacteria<br>Acidobacteria<br>Chloroflexi                                                                                                                                                    | Other<br>Crossiella<br>Other<br>Mycobacterium<br>Gp13<br>Thermosporothrix                                                                                                          | 3,20<br>2,80<br>2,80<br>2,50<br>2,40<br>2,10                                                                            |                                                                                                                                                     |                                                                                                                                     |
| 9  | MC2FB | 2 | Floor   | TGAGCGGAAC | Acidobacteria<br>Chloroflexi<br>Acidobacteria<br>Chloroflexi<br>Chloroflexi<br>Other<br>Thaumarchaeota<br>Proteobacteria<br>Acidobacteria<br>Acidobacteria<br>Acidobacteria<br>Proteobacteria<br>Chloroflexi<br>Proteobacteria<br>Proteobacteria        | Gp2<br>Ktedonobacter<br>Gp1<br>Other<br>Other<br>Other<br>Nitrososphaera<br>Other<br>Gp3<br>Gp13<br>Candidatus Koribacter<br>Rhodoplanes<br>Other<br>Other<br>Other                | 31,67<br>11,68<br>10,18<br>6,80<br>4,20<br>3,30<br>3,30<br>2,50<br>2,30<br>2,10<br>2,00<br>1,50<br>1,50<br>1,20<br>1,00 |                                                                                                                                                     |                                                                                                                                     |
| 10 | MC2SB | 2 | Biofilm | CTGACCGAAC | Acidobacteria<br>Acidobacteria<br>Thaumarchaeota<br>Acidobacteria<br>Other<br>Nitrospirae<br>Proteobacteria<br>Proteobacteria<br>Bacteroidetes<br>Elusimicrobia<br>Acidobacteria<br>Proteobacteria<br>Acidobacteria<br>Proteobacteria<br>Proteobacteria | Gp1<br>Gp2<br>Nitrososphaera<br>Gp3<br>Other<br>Nitrospira<br>Geobacter<br>Other<br>Ferruginibacter<br>Elusimicrobium<br>Candidatus Solibacter<br>Other<br>Other<br>Other<br>Other | 16,10<br>13,00<br>12,20<br>7,00<br>6,40<br>4,70<br>4,20<br>4,10<br>3,60<br>3,30<br>2,70<br>1,60<br>1,60<br>1,60<br>1,40 |                                                                                                                                                     |                                                                                                                                     |
| 11 | MC3F  | 3 | Floor   | TCCTCGAATC | Acidobacteria<br>Acidobacteria<br>Chloroflexi<br>Other<br>Proteobacteria<br>Acidobacteria<br>Acidobacteria<br>Proteobacteria<br>Proteobacteria                                                                                                          | Gp2<br>Gp1<br>Ktedonobacter<br>Other<br>Steroidobacter<br>Gp3<br>Gp5<br>Other<br>Other                                                                                             | 53,60<br>7,90<br>6,40<br>4,80<br>2,40<br>2,00<br>1,90<br>1,40<br>1,20                                                   | Actinobacteria<br>Actinobacteria<br>Actinobacteria<br>Actinobacteria<br>Bacteroidetes<br>Bacteroidetes<br>Bacteroidetes<br>Firmicutes<br>Firmicutes | Dietzia<br>Microbacterium<br>Spirillospora<br>Rubrobacter<br>Alloprevotella<br>Chryseobacterium<br>Other<br>Other<br>Staphylococcus |

|    |         |   |         |            |                                                                                                                                                                                                                                                        |                                                                                                                                                                                                                |                                                                                                                        |                                                                                                                      |                                                                                                                     |
|----|---------|---|---------|------------|--------------------------------------------------------------------------------------------------------------------------------------------------------------------------------------------------------------------------------------------------------|----------------------------------------------------------------------------------------------------------------------------------------------------------------------------------------------------------------|------------------------------------------------------------------------------------------------------------------------|----------------------------------------------------------------------------------------------------------------------|---------------------------------------------------------------------------------------------------------------------|
|    |         |   |         |            | Acidobacteria<br>Acidobacteria<br>Acidobacteria<br>Acidobacteria<br>Chloroflexi<br>Verrucomicrobia                                                                                                                                                     | Other<br>Gp13<br>Candidatus Koribacter<br>Candidatus Solibacter<br>Other<br>Spartobacteria genera incertae sedis                                                                                               | 1,20<br>0,80<br>0,80<br>0,70<br>0,60<br>0,60                                                                           | Firmicutes<br>Fusobacteria<br>Proteobacteria<br>Proteobacteria<br>Proteobacteria<br>Proteobacteria<br>Proteobacteria | Clostridium sensu stricto<br>Fusobacterium<br>Sphingobium<br>Alcaligenes<br>Aquabacterium<br>Tepidimonas<br>Delftia |
| 12 | MC3C    | 3 | Ceiling | TAGGTGGTTC | Acidobacteria<br>Proteobacteria<br>Other<br>Acidobacteria<br>Actinobacteria<br>Firmicutes<br>Thaumarchaeota<br>Nitrospirae<br>Proteobacteria<br>Chloroflexi<br>Actinobacteria<br>Firmicutes<br>Proteobacteria<br>Proteobacteria<br>Actinobacteria      | Gp2<br>Bradyrhizobium<br>Other<br>Gp1<br>Other<br>Bacillus<br>Nitrososphaera<br>Nitrospira<br>Pseudomonas<br>Ktedonobacter<br>Propionibacterium<br>Lysinibacillus<br>Phenylobacterium<br>Burkholderia<br>Other | 9,80<br>8,50<br>7,30<br>4,50<br>4,40<br>3,60<br>3,50<br>3,00<br>3,00<br>2,90<br>2,70<br>2,30<br>2,10<br>1,90<br>1,80   | Proteobacteria<br>Proteobacteria<br>Proteobacteria<br>Proteobacteria<br>Proteobacteria<br>Proteobacteria             | Schlegelella<br>Hydrogenophilus<br>Neisseria<br>Pseudomonas<br>Xanthomonas                                          |
| 13 | GC1F    | 4 | Floor   | TCTAACGGAC | Acidobacteria<br>Chloroflexi<br>Other<br>Acidobacteria<br>Nitrospirae<br>Acidobacteria<br>Proteobacteria<br>Proteobacteria<br>Proteobacteria<br>Synergistetes<br>Thaumarchaeota<br>Proteobacteria<br>Acidobacteria<br>Proteobacteria<br>Proteobacteria | Gp2<br>Ktedonobacter<br>Other<br>Gp1<br>Nitrospira<br>Gp3<br>Steroidobacter<br>Other<br>Other<br>Other<br>Nitrososphaera<br>Other<br>Gp13<br>Cystobacter<br>Other                                              | 36,10<br>17,90<br>6,80<br>5,30<br>4,80<br>2,60<br>1,30<br>1,30<br>1,20<br>1,10<br>1,00<br>0,90<br>0,80<br>0,80<br>0,80 | Acidobacteria<br>Proteobacteria                                                                                      | Bryobacter<br>Rudaea                                                                                                |
| 14 | GMC1FAF | 5 | Floor   | TTGGAGTGTC | Acidobacteria<br>Chloroflexi<br>Other<br>Acidobacteria<br>Acidobacteria<br>Acidobacteria<br>Chloroflexi<br>Chloroflexi<br>Thaumarchaeota                                                                                                               | Gp2<br>Ktedonobacter<br>Other<br>Gp1<br>Candidatus Koribacter<br>Gp13<br>Other<br>Other<br>Nitrososphaera                                                                                                      | 40,50<br>6,60<br>5,40<br>5,40<br>4,10<br>3,90<br>3,60<br>3,00<br>2,50                                                  | Acidobacteria<br>Firmicutes<br>Firmicutes<br>Proteobacteria<br>Proteobacteria<br>Verrucomicrobia                     | Acidicapsa<br>Cohnella<br>Other<br>Dongia<br>Enterobacter<br>Other                                                  |

|    |         |   |         |            |                                                                                                                                                                                                                                                     |                                                                                                                                                                                                                                |                                                                                                                         |  |  |
|----|---------|---|---------|------------|-----------------------------------------------------------------------------------------------------------------------------------------------------------------------------------------------------------------------------------------------------|--------------------------------------------------------------------------------------------------------------------------------------------------------------------------------------------------------------------------------|-------------------------------------------------------------------------------------------------------------------------|--|--|
|    |         |   |         |            | Acidobacteria<br>Nitrospirae<br>Proteobacteria<br>Chloroflexi<br>Acidobacteria<br>Chloroflexi                                                                                                                                                       | Gp3<br>Nitrospira<br>Other<br>Thermosporothrix<br>Other<br>Other                                                                                                                                                               | 2,20<br>2,10<br>1,90<br>1,50<br>1,30<br>1,30                                                                            |  |  |
| 15 | GMC1CAF | 5 | Ceiling | TCTAGAGGTC | Acidobacteria<br>Acidobacteria<br>Acidobacteria<br>Chloroflexi<br>Other<br>Chloroflexi<br>Thaumarchaeota<br>Proteobacteria<br>Acidobacteria<br>Chloroflexi<br>Proteobacteria<br>Acidobacteria<br>Acidobacteria<br>Proteobacteria<br>Verrucomicrobia | Gp2<br>Gp1<br>Gp3<br>Other<br>Other<br>Thermosporothrix<br>Nitrososphaera<br>Other<br>Gp13<br>Ktedonobacter<br>Rhizomicrobium<br>Candidatus Koribacter<br>Candidatus Solibacter<br>Other<br>Subdivision3 genera incertae sedis | 26,60<br>15,80<br>4,90<br>3,60<br>3,50<br>3,10<br>2,20<br>2,10<br>2,00<br>1,90<br>1,90<br>1,80<br>1,80<br>1,50<br>1,40  |  |  |
| 16 | GMC1FE  | 5 | Floor   | TCTGGATGAC | Acidobacteria<br>Chloroflexi<br>Chloroflexi<br>Thaumarchaeota<br>Acidobacteria<br>Chloroflexi<br>Nitrospirae<br>Other<br>Acidobacteria<br>Acidobacteria<br>Acidobacteria<br>Acidobacteria<br>Proteobacteria<br>Proteobacteria<br>Acidobacteria      | Gp2<br>Other<br>Other<br>Ktedonobacter<br>Nitrososphaera<br>Candidatus Koribacter<br>Other<br>Nitrospira<br>Other<br>Gp1<br>Gp13<br>Gp3<br>Gp5<br>Other<br>Other<br>Candidatus Solibacter                                      | 27,30<br>13,00<br>11,10<br>8,80<br>6,10<br>5,10<br>4,30<br>4,10<br>3,70<br>2,90<br>1,70<br>1,60<br>1,40<br>0,90<br>0,60 |  |  |
| 17 | GMC1CE  | 5 | Ceiling | TCTATTCGTC | Acidobacteria<br>Chloroflexi<br>Other<br>Thaumarchaeota<br>Chloroflexi<br>Chloroflexi<br>Nitrospirae<br>Chloroflexi<br>Acidobacteria                                                                                                                | Gp2<br>Ktedonobacter<br>Other<br>Nitrososphaera<br>Other<br>Other<br>Nitrospira<br>Other<br>Gp1                                                                                                                                | 27,20<br>23,70<br>6,10<br>5,70<br>4,50<br>4,10<br>4,00<br>3,20<br>2,70                                                  |  |  |

|    |        |   |         |            |                                                                                                                                                                                                                                                    |                                                                                                                                                                                                        |                                                                                                                        |                                                                                                                                                                              |                                                                                                                                                  |
|----|--------|---|---------|------------|----------------------------------------------------------------------------------------------------------------------------------------------------------------------------------------------------------------------------------------------------|--------------------------------------------------------------------------------------------------------------------------------------------------------------------------------------------------------|------------------------------------------------------------------------------------------------------------------------|------------------------------------------------------------------------------------------------------------------------------------------------------------------------------|--------------------------------------------------------------------------------------------------------------------------------------------------|
|    |        |   |         |            | Acidobacteria<br>Acidobacteria<br>Proteobacteria<br>Chloroflexi<br>Proteobacteria<br>Acidobacteria                                                                                                                                                 | Gp13<br>Gp5<br>Other<br>Thermosporothrix<br>Other<br>Candidatus Koribacter                                                                                                                             | 2,20<br>1,90<br>1,90<br>1,70<br>1,40<br>0,90                                                                           |                                                                                                                                                                              |                                                                                                                                                  |
| 19 | GMC1CG | 5 | Ceiling | TTAGTCGGAC | Acidobacteria<br>Other<br>Chloroflexi<br>Acidobacteria<br>Proteobacteria<br>Thaumarchaeota<br>Nitrospirae<br>Proteobacteria<br>Proteobacteria<br>Acidobacteria<br>Acidobacteria<br>Firmicutes<br>Acidobacteria<br>Proteobacteria<br>Proteobacteria | Gp2<br>Other<br>Ktedonobacter<br>Gp1<br>Burkholderia<br>Nitrososphaera<br>Nitrospira<br>Other<br>Cupriavidus<br>Other<br>Gp3<br>Paenibacillus<br>Gp13<br>Other<br>Variovorax                           | 29,50<br>15,50<br>5,90<br>5,90<br>5,00<br>4,30<br>2,70<br>2,20<br>1,80<br>1,70<br>1,60<br>1,60<br>1,50<br>1,20<br>1,00 |                                                                                                                                                                              |                                                                                                                                                  |
| 20 | LCFAB  | 6 | Floor   | CAGATCCATC | Acidobacteria<br>Chloroflexi<br>Chloroflexi<br>Other<br>Acidobacteria<br>Acidobacteria<br>Chloroflexi<br>Acidobacteria<br>Thaumarchaeota<br>Euryarchaeota<br>Acidobacteria<br>Chloroflexi<br>Nitrospirae<br>Proteobacteria<br>Proteobacteria       | Gp2<br>Ktedonobacter<br>Other<br>Other<br>Gp3<br>Gp13<br>Other<br>Gp1<br>Nitrososphaera<br>Methanomassiliicoccus<br>Candidatus Koribacter<br>Thermosporothrix<br>Nitrospira<br>Rhizomicrobium<br>Other | 34,90<br>13,70<br>8,20<br>3,90<br>3,90<br>3,70<br>3,70<br>3,60<br>3,00<br>2,70<br>2,00<br>1,60<br>1,50<br>1,20<br>1,10 | Euryarchaeota<br>Actinobacteria<br>Actinobacteria<br>Actinobacteria<br>Armatimonadetes<br>Chlamydiae<br>Proteobacteria<br>Proteobacteria<br>Proteobacteria<br>Proteobacteria | Other<br>Catenulispora<br>Arthrobacter<br>Kutzneria<br>Armatimonadetes_gp4<br>Other<br>Afipia<br>Acidocella<br>Other<br>Pandoraea<br>Thermomonas |
| 21 | LCFCE  | 6 | Floor   | TCGCAATTAC | Acidobacteria<br>Other<br>Acidobacteria<br>Chloroflexi<br>Acidobacteria<br>Proteobacteria<br>Acidobacteria<br>Chloroflexi<br>Chloroflexi                                                                                                           | Gp2<br>Other<br>Gp13<br>Ktedonobacter<br>Gp1<br>Other<br>Gp3<br>Other<br>Other                                                                                                                         | 28,40<br>9,60<br>7,30<br>6,60<br>5,70<br>3,10<br>2,90<br>2,70<br>2,10                                                  |                                                                                                                                                                              |                                                                                                                                                  |

|    |       |   |         |            |                                                                                                                                                                                                                                                     |                                                                                                                                                                  |                                                                                                                        |  |  |
|----|-------|---|---------|------------|-----------------------------------------------------------------------------------------------------------------------------------------------------------------------------------------------------------------------------------------------------|------------------------------------------------------------------------------------------------------------------------------------------------------------------|------------------------------------------------------------------------------------------------------------------------|--|--|
|    |       |   |         |            | Proteobacteria<br>Proteobacteria<br>Thaumarchaeota<br>Nitrospirae<br>Chloroflexi<br>Bacteroidetes                                                                                                                                                   | Rhodoplanes<br>Other<br>Nitrososphaera<br>Nitrospira<br>Thermogemmatisspora<br>Other                                                                             | 2,00<br>1,80<br>1,60<br>1,50<br>1,40<br>1,40                                                                           |  |  |
| 22 | LCCAB | 6 | Ceiling | TTCGAGACGC | Actinobacteria<br>Acidobacteria<br>Other<br>Actinobacteria<br>Acidobacteria<br>Acidobacteria<br>Proteobacteria<br>Chloroflexi<br>Acidobacteria<br>Actinobacteria<br>Firmicutes<br>Nitrospirae<br>Proteobacteria<br>Proteobacteria<br>Proteobacteria | Other<br>Gp2<br>Other<br>Other<br>Gp1<br>Gp13<br>Other<br>Ktedonobacter<br>Gp3<br>Mycobacterium<br>Other<br>Nitrospira<br>Other<br>Other<br>Other                | 22,40<br>17,60<br>9,30<br>4,30<br>4,20<br>3,90<br>3,80<br>3,30<br>2,40<br>1,70<br>1,60<br>1,50<br>1,40<br>1,30<br>1,20 |  |  |
| 23 | LCCCE | 6 | Ceiling | TGCCACGAAC | Acidobacteria<br>Other<br>Acidobacteria<br>Chloroflexi<br>Proteobacteria<br>Acidobacteria<br>Chloroflexi<br>Firmicutes<br>Thaumarchaeota<br>Acidobacteria<br>Proteobacteria<br>Nitrospirae<br>Chloroflexi<br>Chloroflexi<br>Proteobacteria          | Gp2<br>Other<br>Gp1<br>Ktedonobacter<br>Other<br>Gp13<br>Other<br>Other<br>Nitrososphaera<br>Gp3<br>Other<br>Nitrospira<br>Other<br>Thermogemmatisspora<br>Other | 23,60<br>13,80<br>5,00<br>4,90<br>4,80<br>3,70<br>3,70<br>3,10<br>3,10<br>2,20<br>1,90<br>1,60<br>1,60<br>1,60<br>1,50 |  |  |
| 24 | LCCF  | 6 | Ceiling | AACCTCATTC | Proteobacteria<br>Acidobacteria<br>Proteobacteria<br>Acidobacteria<br>Bacteroidetes<br>Other<br>Proteobacteria<br>Thaumarchaeota<br>Proteobacteria                                                                                                  | Burkholderia<br>Gp13<br>Rhizobium<br>Gp2<br>Mucilaginibacter<br>Other<br>Glaciimonas<br>Nitrososphaera<br>Other                                                  | 26,30<br>14,80<br>11,70<br>10,00<br>3,70<br>3,50<br>3,50<br>3,00<br>1,90                                               |  |  |



|    |       |   |         |            |                                                                                                                                                                                                                                              |                                                                                                                                                                                              |                                                                                                                        |                                                                                                                           |                                                                                                                        |
|----|-------|---|---------|------------|----------------------------------------------------------------------------------------------------------------------------------------------------------------------------------------------------------------------------------------------|----------------------------------------------------------------------------------------------------------------------------------------------------------------------------------------------|------------------------------------------------------------------------------------------------------------------------|---------------------------------------------------------------------------------------------------------------------------|------------------------------------------------------------------------------------------------------------------------|
|    |       |   |         |            | Armatimonadetes<br>Proteobacteria<br>Proteobacteria<br>Proteobacteria<br>Proteobacteria<br>Chloroflexi                                                                                                                                       | Chthonomonas/Armatimonadetes_gp3<br>Other<br>Cupriavidus<br>Other<br>Ralstonia<br>Ktedonobacter                                                                                              | 1,40<br>1,20<br>1,10<br>1,00<br>0,90<br>0,80                                                                           |                                                                                                                           |                                                                                                                        |
| 25 | LQCF* | 7 | Floor   | CCTGAGATAC | Acidobacteria<br>Actinobacteria<br>Acidobacteria<br>Actinobacteria<br>Other<br>Acidobacteria<br>Chloroflexi<br>Acidobacteria<br>Chloroflexi<br>Chloroflexi<br>Acidobacteria<br>Verrucomicrobia<br>Proteobacteria<br>Actinobacteria           | Gp1<br>Other<br>Gp3<br>Other<br>Other<br>Gp13<br>Other<br>Gp2<br>Thermogemmatipora<br>Ktedonobacter<br>Other<br>Acidipila<br>Spartobacteria_genera_incertae_sedis<br>Other<br>Conexibacter   | 37,60<br>10,80<br>5,50<br>5,10<br>4,60<br>4,10<br>3,90<br>3,60<br>3,40<br>2,70<br>2,10<br>2,00<br>1,30<br>1,10<br>1,00 | Acidobacteria<br>Actinobacteria<br>Bacteroidetes<br>Proteobacteria<br>Proteobacteria<br>Proteobacteria<br>Verrucomicrobia | Acidobacterium<br>Other<br>Pedobacter<br>Other<br>Granulibacter<br>Aquicella<br>Coxiella<br>Diploricetisia<br>Opitutus |
| 26 | LQCC* | 7 | Ceiling | TTACAACCTC | Acidobacteria<br>Chloroflexi<br>Other<br>Acidobacteria<br>Acidobacteria<br>Chloroflexi<br>Acidobacteria<br>Actinobacteria<br>Chloroflexi<br>Firmicutes<br>Acidobacteria<br>Acidobacteria<br>Verrucomicrobia<br>Chloroflexi<br>Actinobacteria | Gp3<br>Ktedonobacter<br>Other<br>Gp2<br>Gp13<br>Other<br>Gp1<br>Other<br>Thermosporothrix<br>Other<br>Other<br>Acidipila<br>Spartobacteria_genera_incertae_sedis<br>Other<br>Aciditerrimonas | 10,39<br>10,10<br>8,00<br>7,50<br>7,20<br>6,30<br>5,80<br>5,70<br>4,50<br>2,90<br>2,80<br>2,30<br>1,90<br>1,40<br>1,30 |                                                                                                                           |                                                                                                                        |
| 27 | SMF1  | 8 | Floor   | AACCATCCGC | Chloroflexi<br>Actinobacteria<br>Acidobacteria<br>Acidobacteria<br>Actinobacteria<br>Actinobacteria<br>Acidobacteria<br>Actinobacteria<br>Actinobacteria                                                                                     | Ktedonobacter<br>Mycobacterium<br>Gp13<br>Acidipila<br>Crossiella<br>Conexibacter<br>Gp3<br>Actinoallomurus<br>Other                                                                         | 25,48<br>14,68<br>8,80<br>6,50<br>4,20<br>3,40<br>3,20<br>3,10<br>2,90                                                 | Acidobacteria<br>Actinobacteria<br>Actinobacteria<br>Actinobacteria<br>Proteobacteria<br>Proteobacteria<br>Proteobacteria | Other<br>Rudaeicoccus<br>Other<br>Millisia<br>Bauldia<br>Stella<br>Rhodocista                                          |

|    |      |   |         |            |                                                                                                                                                                                                                                                    |                                                                                                                                                                                  |                                                                                                                         |  |  |
|----|------|---|---------|------------|----------------------------------------------------------------------------------------------------------------------------------------------------------------------------------------------------------------------------------------------------|----------------------------------------------------------------------------------------------------------------------------------------------------------------------------------|-------------------------------------------------------------------------------------------------------------------------|--|--|
|    |      |   |         |            | Actinobacteria<br>Chloroflexi<br>Proteobacteria<br>Proteobacteria<br>Planctomycetes<br>Other                                                                                                                                                       | Other<br>Thermosporothrix<br>Acidisoma<br>Dokdonella<br>Gemmata<br>Other                                                                                                         | 2,90<br>2,60<br>2,50<br>2,10<br>1,90<br>1,80                                                                            |  |  |
| 28 | SMF2 | 8 | Floor   | ATCCGGAATC | Acidobacteria<br>Other<br>Acidobacteria<br>Thaumarchaeota<br>Chloroflexi<br>Acidobacteria<br>Acidobacteria<br>Chloroflexi<br>Chloroflexi<br>Acidobacteria<br>Proteobacteria<br>Acidobacteria<br>Nitrospirae<br>Euryarchaeota<br>Proteobacteria     | Gp2<br>Other<br>Gp13<br>Nitrososphaera<br>Ktedonobacter<br>Gp1<br>Candidatus Koribacter<br>Other<br>Other<br>Gp3<br>Other<br>Gp5<br>Nitrospira<br>Methanomassiliicoccus<br>Other | 22,47<br>9,85<br>8,30<br>7,60<br>6,90<br>4,30<br>3,10<br>3,00<br>2,90<br>2,70<br>2,40<br>2,30<br>2,20<br>1,40<br>1,00   |  |  |
| 29 | SMC1 | 8 | Ceiling | TCGACCACTC | Actinobacteria<br>Acidobacteria<br>Proteobacteria<br>Acidobacteria<br>Chloroflexi<br>Proteobacteria<br>Other<br>Acidobacteria<br>Firmicutes<br>Chloroflexi<br>Actinobacteria<br>Acidobacteria<br>Proteobacteria<br>Actinobacteria<br>Acidobacteria | Other<br>Gp2<br>Other<br>Acidipila<br>Other<br>Other<br>Other<br>Gp13<br>Other<br>Ktedonobacter<br>Other<br>Candidatus Koribacter<br>Other<br>Mycobacterium<br>Gp1               | 21,27<br>10,56<br>10,18<br>5,60<br>5,10<br>4,80<br>4,10<br>3,90<br>3,40<br>2,90<br>2,90<br>2,80<br>2,20<br>2,10<br>1,90 |  |  |
| 30 | SMC2 | 8 | Ceiling | CGAGGTTATC | Acidobacteria<br>Acidobacteria<br>Other<br>Proteobacteria<br>Nitrospirae<br>Acidobacteria<br>Thaumarchaeota<br>Chloroflexi<br>Actinobacteria                                                                                                       | Gp2<br>Gp13<br>Other<br>Other<br>Nitrospira<br>Gp4<br>Nitrososphaera<br>Ktedonobacter<br>Other                                                                                   | 27,06<br>18,08<br>10,10<br>5,70<br>4,00<br>3,40<br>3,10<br>2,80<br>2,30                                                 |  |  |

|  |  |  |  |  |                |                   |      |  |  |
|--|--|--|--|--|----------------|-------------------|------|--|--|
|  |  |  |  |  | Acidobacteria  | Gp1               | 2,20 |  |  |
|  |  |  |  |  | Chloroflexi    | Other             | 1,60 |  |  |
|  |  |  |  |  | Other          | Other             | 1,60 |  |  |
|  |  |  |  |  | Proteobacteria | Other             | 1,30 |  |  |
|  |  |  |  |  | Actinobacteria | Streptacidiphilus | 1,10 |  |  |
|  |  |  |  |  | Proteobacteria | Cystobacter       | 1,00 |  |  |
