# Supplementary material
Source: MDPI journal article supplement (https://www.mdpi.com/1424-2818/13/10/494)
Supplement: s1 [file s1]

# 16S rRNA gene amplicon sequencing data of the Iron Quadrangle ferruginous caves (Brazil) shows the importance of conserving this singular and threatened geosystem

**Short title:** 16S rRNA gene amplicon sequencing of ferruginous caves

Camila Gracyelle de Carvalho Lemes<sup>1</sup>, Morghana Marina Villa<sup>2</sup>, Érica Barbosa Felestrino<sup>1</sup>, Luiza Oliveira Perucci<sup>3</sup>, Renata Almeida Barbosa Assis<sup>1</sup>, Isabella Ferreira Cordeiro<sup>1</sup>, Natasha Peixoto Fonseca<sup>1</sup>, Lara Chaves Carvalho Guerra<sup>2</sup>, Washington Luiz Caneschi<sup>1</sup>, Lauro Ângelo Gonçalves de Moraes<sup>4</sup>, Flávio Fonseca do Carmo<sup>5</sup>, Luciana Hiromi Yoshino Kamino<sup>5</sup>, Pedro Navarro Cardoso Vale<sup>6</sup>, Suzana Eiko Sato Guima<sup>7</sup>, João Carlos Setubal<sup>7</sup>, André Augusto Rodrigues Salgado<sup>6</sup>, Leandro Marcio Moreira<sup>1,2#</sup>.

## Supplementary Table S2. Beta-Diversity indices analysis.

### ANOSIM - origin by cave

|                    | Ceiling vs Floor |         | Cave 1  |         | Cave 2  |         | Cave 5  |         | Cave 6  |         | Cave 8  |         |
|--------------------|------------------|---------|---------|---------|---------|---------|---------|---------|---------|---------|---------|---------|
|                    | p-value          | q-value | p-value | q-value | p-value | q-value | p-value | q-value | p-value | q-value | p-value | q-value |
| Aitchison          | 0.007            | 0.007   | 0.342   | 0.342   | 0.072   | 0.072   | 0.900   | 0.900   | 0.212   | 0.212   | 1,000   | 1,000   |
| Bray Curtis        | 0.007            | 0.007   | 0.331   | 0.331   | 0.100   | 0.100   | 1,000   | 1,000   | 0.302   | 0.302   | 1,000   | 1,000   |
| Euclidean          | 0.011            | 0.011   | 0.326   | 0.326   | 0.093   | 0.093   | 0.492   | 0.492   | 0.900   | 0.900   | 1,000   | 1,000   |
| Unweighted Unifrac | 0.010            | 0.010   | 0.343   | 0.343   | 0.102   | 0.102   | 1,000   | 1,000   | 0.291   | 0.291   | 1,000   | 1,000   |
| Weighted Unifrac   | 0.008            | 0.008   | 0.343   | 0.343   | 0.109   | 0.109   | 0.808   | 0.808   | 0.418   | 0.418   | 0.657   | 0.657   |

Note 1: Biofilm was not considered for these analysis; Note 2: For each cave, we compared ceiling vs floor; More information about ANOSIM: <https://sites.google.com/site/mb3gustame/hypothesis-tests/anosim>

### PERMANOVA - origin by cave

|                    | Ceiling vs Floor |         | Cave 1  |         | Cave 2  |         | Cave 5  |         | Cave 6  |         | Cave 8  |         |
|--------------------|------------------|---------|---------|---------|---------|---------|---------|---------|---------|---------|---------|---------|
|                    | p-value          | q-value | p-value | q-value | p-value | q-value | p-value | q-value | p-value | q-value | p-value | q-value |
| Aitchison          | 0.006            | 0.006   | 0.362   | 0.362   | 0.113   | 0.113   | 0.806   | 0.806   | 0.199   | 0.199   | 0.649   | 0.649   |
| Bray Curtis        | 0.011            | 0.011   | 0.352   | 0.352   | 0.103   | 0.103   | 0.612   | 0.612   | 0.194   | 0.194   | 0.673   | 0.673   |
| Euclidean          | 0.013            | 0.013   | 0.332   | 0.332   | 0.102   | 0.102   | 0.312   | 0.312   | 0.596   | 0.596   | 0.642   | 0.642   |
| Unweighted Unifrac | 0.016            | 0.016   | 0.323   | 0.323   | 0.103   | 0.103   | 0.711   | 0.711   | 0.182   | 0.182   | 1,000   | 1,000   |
| Weighted Unifrac   | 0.019            | 0.019   | 0.346   | 0.346   | 0.102   | 0.102   | 0.508   | 0.508   | 0.202   | 0.202   | 0.679   | 0.679   |

Note 1: Biofilm was not considered for these analysis; Note 2: For each cave, we compared ceiling vs floor; More information about PERMANOVA: <https://sites.google.com/site/mb3gustame/hypothesis-tests/manova/npmanova>.

Note: The caves 3, 4 and 7 were not included because the analysis requires at least two samples within a group to calculate the distance within a group.
