# Supplementary material
Source: MDPI journal article supplement (https://www.mdpi.com/1424-2818/13/10/494)
Supplement: s1 [file s1]

Archive with 6 entries (6 files):
- Supplemental_figures.pdf
- Table_S1.pdf
- Table_S2.pdf
- Table_S3.pdf
- Table_S4.xlsx
- Table_S5.pdf
