# Supplementary material
Source: MDPI journal article supplement (https://www.mdpi.com/1424-2818/13/10/494)
Supplement: s1 [file s1 › Table_S4.xlsx]

## Sheet: Planilha2
16S rRNA gene amplicon sequencing data of the Iron Quadrangle ferruginous caves (Brazil) shows the importance of conserving this singular and threatened geosystem
Short title: 16S rRNA gene amplicon sequencing of ferruginous caves
Camila Gracyelle de Carvalho Lemes1, Morghana Marina Villa2, Érica Barbosa Felestrino1, Luiza Oliveira Perucci3, Renata Almeida Barbosa Assis1, Isabella Ferreira Cordeiro1, Natasha Peixoto Fonseca1, Lara Chaves Carvalho Guerra2,
Washington Luiz Caneschi1, Lauro Ângelo Gonçalves de Moraes4, Flávio Fonseca do Carmo5, Luciana Hiromi Yoshino Kamino5, Pedro Navarro Cardoso Vale6, Suzana Eiko Sato Guima7, João Carlos Setubal7, André Augusto Rodrigues Salgado6, Leandro Marcio Moreira1,2#.
Supplementary Table S4 . Relative abundance (%) of all OTUs identified
kingdom	phylum	class	order	family	genus	1	2	3	4	5	6	7	8	9	10	11	12	13	14	15	16	17	19	20	21	22	23	24	25	26	27	28	29	30
Bacteria	Acidobacteria	Acidobacteria_Gp2	Gp2	Gp2	Gp2	0.406	0.345	0.317	0.294	0.172	0.152	0.036	0.04	0.317	0.13	0.536	0.098	0.361	0.405	0.266	0.273	0.272	0.295	0.349	0.284	0.176	0.236	0.1	0.036	0.075	0.004	0.225	0.106	0.271
Bacteria	Acidobacteria	Acidobacteria_Gp1	Gp1	Gp1	Gp1	0.097	0.103	0.044	0.044	0.151	0.171	0.012	0.044	0.102	0.161	0.079	0.045	0.053	0.054	0.158	0.037	0.027	0.059	0.036	0.057	0.042	0.05	0.006	0.377	0.058	0.001	0.043	0.019	0.022
Bacteria	Acidobacteria	Acidobacteria_Gp13	Gp13	Gp13	Gp13	0.015	0.011	0.013	0.023	0.054	0.032	0.021	0.024	0.021	0.003	0.008	0.011	0.008	0.039	0.02	0.029	0.022	0.015	0.037	0.073	0.039	0.037	0.148	0.041	0.072	0.088	0.083	0.039	0.181
Bacteria	Acidobacteria	Acidobacteria_Gp3	Gp3	Gp3	Gp3	0.015	0.021	0.017	0.012	0.07	0.102	0.02	0.014	0.023	0.07	0.02	0.016	0.026	0.022	0.049	0.017	0.005	0.016	0.039	0.029	0.024	0.022	0.007	0.055	0.104	0.032	0.027	0.004	0.008
Bacteria	Acidobacteria	Acidobacteria_Gp5	Gp5	Gp5	Gp5	0.023	0.026	0.014	0.007	0.005	0.01	0	0	0.01	0.01	0.019	0.012	0.002	0.006	0.002	0.016	0.019	0.002	0.004	0.003	0.002	0.005	0	0	0	0	0.023	0	0.002
Bacteria	Acidobacteria	Acidobacteria_Gp1	Candidatus Koribacter	Candidatus Koribacter	Candidatus Koribacter	0.011	0.021	0.013	0.006	0.011	0.016	0.001	0	0.02	0.003	0.008	0.001	0.005	0.041	0.018	0.061	0.009	0.009	0.02	0.01	0.006	0.014	0.002	0.003	0.001	0	0.031	0.028	0.002
Bacteria	Acidobacteria	Acidobacteria_Gp1	Other	Other	Other	0.002	0.003	0.002	0.004	0.015	0.012	0.009	0.076	0.004	0.003	0.012	0.002	0.005	0.013	0.013	0.005	0.001	0.017	0.007	0.004	0.008	0.002	0.008	0.021	0.028	0.005	0.002	0.012	0.003
Bacteria	Acidobacteria	Acidobacteria_Gp17	Gp17	Gp17	Gp17	0.007	0.004	0.003	0.003	0	0	0	0	0	0	0.001	0	0.003	0.001	0	0	0.001	0.002	0	0	0.002	0.003	0	0	0	0	0.002	0	0.007
Bacteria	Acidobacteria	Acidobacteria_Gp4	Gp4	Gp4	Gp4	0.002	0.002	0.002	0.003	0	0	0	0	0.002	0	0.002	0	0.006	0.008	0.001	0.001	0	0.003	0.001	0.001	0.006	0.001	0.003	0	0	0	0.001	0	0.034
Bacteria	Acidobacteria	Acidobacteria_Gp15	Gp15	Gp15	Gp15	0.002	0.001	0.008	0.002	0.001	0	0	0	0.001	0	0	0	0	0.001	0	0.001	0.002	0	0.002	0.006	0	0.006	0	0	0	0	0.009	0	0.001
Bacteria	Acidobacteria	Acidobacteria_Gp6	Gp6	Gp6	Gp6	0.005	0.004	0.002	0.002	0.002	0.004	0	0	0.001	0.002	0.005	0.011	0.007	0.001	0.001	0.001	0.002	0.003	0.001	0.002	0.002	0.004	0	0	0	0	0.002	0.001	0.003
Bacteria	Acidobacteria	Acidobacteria_Gp3	Candidatus Solibacter	Candidatus Solibacter	Candidatus Solibacter	0.006	0.006	0.004	0.001	0.014	0.017	0	0	0.01	0.027	0.007	0.005	0.001	0.004	0.018	0.006	0.004	0.001	0.005	0.006	0.001	0.004	0	0	0.005	0.001	0.007	0	0
Bacteria	Acidobacteria	Acidobacteria_Gp7	Gp7	Gp7	Gp7	0.005	0.005	0.004	0.001	0.002	0.001	0	0	0.001	0	0.002	0.004	0.004	0	0	0.002	0.001	0	0	0.001	0.001	0.004	0	0	0	0	0	0	0.001
Bacteria	Acidobacteria	Acidobacteria_Gp3	Other	Other	Other	0.006	0.005	0.002	0.001	0.006	0.012	0	0	0.003	0.016	0.005	0.005	0.001	0.005	0.004	0.004	0.004	0.002	0.004	0.006	0.001	0.005	0.001	0	0.001	0	0.009	0	0.007
Bacteria	Acidobacteria	Acidobacteria_Gp1	Edaphobacter	Edaphobacter	Edaphobacter	0.001	0.002	0.001	0.001	0.001	0.001	0	0	0	0	0.001	0	0.001	0.002	0.003	0	0	0.002	0	0.001	0.002	0	0.001	0.001	0	0	0	0.001	0
Bacteria	Acidobacteria	Other	Other	Other	Other	0.001	0.001	0.001	0.001	0.003	0.004	0	0.001	0.002	0.001	0.001	0	0.001	0.002	0.003	0.001	0.001	0	0.001	0.001	0.002	0.002	0.003	0.002	0.001	0	0.001	0	0.005
Bacteria	Acidobacteria	Acidobacteria_Gp1	Granulicella	Granulicella	Granulicella	0	0	0.001	0	0.003	0.003	0.006	0.002	0	0	0	0	0	0.001	0.006	0	0	0.001	0.002	0.002	0.001	0	0	0	0.003	0	0	0	0
Bacteria	Acidobacteria	Acidobacteria_Gp10	Gp10	Gp10	Gp10	0.001	0.002	0	0	0	0	0	0	0	0	0.001	0.004	0	0	0	0	0	0	0	0	0	0	0	0.003	0	0	0	0	0
Bacteria	Acidobacteria	Acidobacteria_Gp1	Acidipila	Acidipila	Acidipila	0	0.001	0	0	0.001	0.001	0.02	0.038	0	0	0	0	0	0.001	0.013	0	0	0	0.002	0.001	0.009	0	0.002	0.02	0.023	0.065	0	0.056	0
Bacteria	Acidobacteria	Acidobacteria_Gp1	Acidicapsa	Acidicapsa	Acidicapsa	0	0	0	0	0	0	0	0	0	0	0	0	0	0	0.002	0	0	0	0	0	0	0	0	0	0	0	0	0	0
Bacteria	Acidobacteria	Acidobacteria_Gp1	Acidobacterium	Acidobacterium	Acidobacterium	0	0	0	0	0	0	0	0	0	0	0	0	0	0	0	0	0	0	0	0	0	0	0	0	0.002	0	0	0	0
Bacteria	Acidobacteria	Acidobacteria_Gp1	Telmatobacter	Telmatobacter	Telmatobacter	0	0	0	0	0.002	0.001	0	0	0	0.001	0	0	0	0	0.003	0	0	0	0	0	0	0	0	0	0	0	0	0	0
Bacteria	Acidobacteria	Acidobacteria_Gp1	Terriglobus	Terriglobus	Terriglobus	0	0	0	0	0	0	0	0	0	0	0	0	0.001	0	0	0	0	0.002	0	0	0	0	0	0	0	0	0	0	0
Bacteria	Acidobacteria	Acidobacteria_Gp3	Bryobacter	Bryobacter	Bryobacter	0	0	0	0	0	0	0	0	0	0	0	0	0.003	0	0	0	0	0	0	0	0	0	0	0	0	0	0	0	0
Bacteria	Acidobacteria	Acidobacteria_Gp4	Other	Other	Other	0	0	0	0	0	0	0	0	0	0	0	0	0	0	0	0	0	0	0	0	0	0	0	0	0	0	0	0	0.002
Bacteria	Actinobacteria	Actinobacteria	Actinomycetales	Pseudonocardiaceae	Other	0	0.001	0.003	0.023	0	0.001	0.052	0.032	0	0	0	0.018	0.002	0.002	0.001	0	0	0.004	0.002	0.001	0.043	0.01	0.001	0.051	0.057	0.029	0	0.213	0.023
Bacteria	Actinobacteria	Actinobacteria	Actinomycetales	Other	Other	0	0	0.002	0.004	0.001	0.001	0.408	0.164	0	0	0.001	0.044	0	0	0.011	0	0	0.002	0	0.001	0.224	0.002	0.003	0.108	0.006	0.029	0	0.029	0.003
Bacteria	Actinobacteria	Actinobacteria	Actinomycetales	Thermomonosporaceae	Actinoallomurus	0.004	0.005	0.001	0.002	0.009	0.015	0.011	0.011	0.007	0.001	0.005	0.005	0.001	0.002	0.009	0	0	0.001	0.003	0.005	0.004	0.003	0	0	0.002	0.031	0.003	0.002	0.001
Bacteria	Actinobacteria	Actinobacteria	Acidimicrobiales	Acidimicrobineae_incertae_sedis	Aciditerrimonas	0.001	0.001	0	0.001	0.003	0.003	0.001	0.003	0.001	0.001	0.001	0.005	0	0	0.001	0	0.001	0.001	0.001	0.002	0.001	0.001	0	0.004	0.013	0.008	0.001	0.001	0.001
Bacteria	Actinobacteria	Actinobacteria	Solirubrobacterales	Conexibacteraceae	Conexibacter	0	0.001	0	0	0.004	0.005	0.012	0.007	0	0	0.001	0.001	0	0	0.001	0	0	0	0	0.001	0.001	0.001	0	0.01	0.008	0.034	0	0.006	0
Bacteria	Actinobacteria	Actinobacteria	Actinomycetales	Mycobacteriaceae	Mycobacterium	0	0	0	0	0.001	0.001	0.012	0.025	0.001	0	0	0.004	0.001	0	0.003	0.001	0	0	0.001	0.001	0.017	0.002	0	0.003	0.011	0.147	0	0.021	0.001
Bacteria	Actinobacteria	Actinobacteria	Actinomycetales	Pseudonocardiaceae	Crossiella	0	0	0	0	0	0	0.019	0.028	0	0	0	0.002	0.001	0	0	0	0	0.001	0	0	0	0	0	0.006	0.005	0.042	0	0	0
Bacteria	Actinobacteria	Actinobacteria	Actinomycetales	Propionibacteriaceae	Propionibacterium	0	0	0	0	0	0	0.001	0	0	0	0	0.027	0	0	0	0	0	0	0	0	0	0	0	0	0	0	0	0	0.001
Bacteria	Actinobacteria	Actinobacteria	Actinomycetales	Streptomycetaceae	Streptacidiphilus	0	0	0	0	0	0	0	0.001	0	0	0	0	0	0	0	0	0	0.001	0	0.002	0.004	0.002	0.001	0	0.001	0.001	0	0.001	0.011
Bacteria	Actinobacteria	Actinobacteria	Acidimicrobiales	Acidimicrobiaceae	Other	0	0	0	0	0	0	0	0	0	0	0	0	0	0	0	0	0	0	0	0	0	0	0	0	0	0	0	0	0
Bacteria	Actinobacteria	Actinobacteria	Acidimicrobiales	Iamiaceae	Iamia	0	0	0	0	0	0	0	0.001	0	0	0	0	0	0	0	0	0	0	0	0	0	0	0	0	0.001	0	0	0	0
Bacteria	Actinobacteria	Actinobacteria	Acidimicrobiales	Other	Other	0	0	0	0	0	0	0	0	0	0	0	0.004	0	0	0	0	0	0	0	0	0.001	0	0	0.005	0	0	0	0	0
Bacteria	Actinobacteria	Actinobacteria	Actinomycetales	Actinospicaceae	Actinospica	0	0	0	0	0	0	0	0	0	0	0	0	0	0	0.001	0	0	0.002	0	0	0	0	0	0	0	0.008	0	0	0
Bacteria	Actinobacteria	Actinobacteria	Actinomycetales	Catenulisporaceae	Catenulispora	0	0	0	0	0	0	0	0	0	0	0	0	0	0	0	0	0	0	0	0	0	0	0.005	0	0	0	0	0	0
Bacteria	Actinobacteria	Actinobacteria	Actinomycetales	Dermacoccaceae	Rudaeicoccus	0	0	0	0	0	0	0	0	0	0	0	0	0	0	0	0	0	0	0	0	0	0	0	0	0	0.001	0	0	0
Bacteria	Actinobacteria	Actinobacteria	Actinomycetales	Dietziaceae	Dietzia	0	0	0	0	0	0	0	0	0	0	0	0.004	0	0	0	0	0	0	0	0	0	0	0	0	0	0	0	0	0
Bacteria	Actinobacteria	Actinobacteria	Actinomycetales	Microbacteriaceae	Leucobacter	0	0	0	0	0	0	0	0	0	0	0	0	0	0	0	0	0	0	0	0	0	0	0	0	0	0	0	0	0
Bacteria	Actinobacteria	Actinobacteria	Actinomycetales	Microbacteriaceae	Microbacterium	0	0	0	0	0	0	0	0	0	0	0	0.001	0	0	0	0	0	0	0	0	0	0	0	0	0	0	0	0	0
Bacteria	Actinobacteria	Actinobacteria	Actinomycetales	Micrococcaceae	Arthrobacter	0	0	0	0	0	0	0	0	0	0	0	0	0	0	0	0	0	0	0	0.001	0	0	0	0	0	0	0	0	0
Bacteria	Actinobacteria	Actinobacteria	Actinomycetales	Micromonosporaceae	Other	0	0	0	0	0	0	0	0	0	0	0	0	0	0	0	0	0	0	0	0	0	0	0	0	0	0.005	0	0	0
Bacteria	Actinobacteria	Actinobacteria	Actinomycetales	Nocardiaceae	Millisia	0	0	0	0	0	0	0	0	0	0	0	0	0	0	0	0	0	0	0	0	0	0	0	0	0	0.001	0	0	0
Bacteria	Actinobacteria	Actinobacteria	Actinomycetales	Nocardiaceae	Nocardia	0	0	0	0	0	0	0	0	0	0	0	0	0	0	0	0	0	0	0	0	0	0	0	0	0	0	0	0	0
Bacteria	Actinobacteria	Actinobacteria	Actinomycetales	Pseudonocardiaceae	Kutzneria	0	0	0	0	0	0	0	0	0	0	0	0	0	0	0	0	0	0	0	0	0	0	0.003	0	0	0	0	0	0
Bacteria	Actinobacteria	Actinobacteria	Actinomycetales	Pseudonocardiaceae	Pseudonocardia	0	0	0	0	0	0	0.002	0	0	0	0	0.001	0	0	0	0	0	0	0	0	0	0	0	0.002	0.005	0.001	0	0	0
Bacteria	Actinobacteria	Actinobacteria	Actinomycetales	Streptomycetaceae	Other	0	0	0	0	0	0	0	0	0	0	0	0	0	0	0	0	0	0	0	0	0	0	0	0	0	0	0	0	0
Bacteria	Actinobacteria	Actinobacteria	Actinomycetales	Thermomonosporaceae	Other	0	0	0	0	0.001	0.003	0	0	0	0	0	0.002	0	0	0.001	0	0	0	0	0.001	0	0.001	0	0	0	0	0	0	0
Bacteria	Actinobacteria	Actinobacteria	Actinomycetales	Thermomonosporaceae	Spirillospora	0	0	0	0	0	0	0	0	0	0	0	0.003	0	0	0	0	0	0	0	0	0	0	0	0	0	0	0	0	0
Bacteria	Actinobacteria	Actinobacteria	Gaiellales	Gaiellaceae	Gaiella	0	0	0	0	0	0	0	0	0	0	0	0.001	0	0	0	0	0	0	0	0	0	0	0	0.001	0.003	0	0	0	0
Bacteria	Actinobacteria	Actinobacteria	Other	Other	Other	0	0	0	0	0	0	0	0.001	0	0	0	0	0	0	0	0	0	0	0	0	0	0	0	0.001	0.001	0	0	0	0
Bacteria	Actinobacteria	Actinobacteria	Rubrobacterales	Rubrobacteraceae	Rubrobacter	0	0	0	0	0	0	0	0	0	0	0	0.002	0	0	0	0	0	0	0	0	0	0	0	0	0	0	0	0	0
Bacteria	Actinobacteria	Actinobacteria	Solirubrobacterales	Other	Other	0	0	0	0	0	0	0	0	0	0	0	0	0	0	0	0	0	0	0	0	0	0	0	0	0.004	0	0	0	0
Bacteria	Armatimonadetes	Chthonomonadetes	Chthonomonadales	Chthonomonadaceae	Chthonomonas/Armatimonadetes_gp3	0	0	0.001	0.001	0	0	0	0	0	0	0	0	0.003	0	0	0	0	0.001	0	0	0.002	0	0.014	0	0.001	0	0	0	0.002
Bacteria	Armatimonadetes	Armatimonadetes_gp4	Armatimonadetes_gp4	Armatimonadetes_gp4	Armatimonadetes_gp4	0	0	0	0	0	0	0	0	0	0	0	0	0	0	0	0	0	0	0	0	0	0	0.001	0	0	0	0	0	0
Bacteria	Bacteroidetes	Sphingobacteriia	Sphingobacteriales	Chitinophagaceae	Other	0.001	0.003	0	0	0.006	0.002	0	0	0	0.004	0.001	0	0.004	0.001	0.006	0	0	0.003	0.001	0.014	0.001	0	0.001	0.001	0	0	0.001	0	0
Bacteria	Bacteroidetes	Bacteroidetes_incertae_sedis	Ohtaekwangia	Ohtaekwangia	Ohtaekwangia	0	0.001	0	0	0.001	0	0	0	0	0	0	0	0	0	0	0	0	0	0	0	0	0	0	0	0	0	0	0	0
Bacteria	Bacteroidetes	Flavobacteriia	Flavobacteriales	Flavobacteriaceae	Flavobacterium	0	0.001	0	0	0	0	0	0	0	0	0	0	0	0	0	0	0	0	0	0	0	0	0	0	0	0	0	0	0
Bacteria	Bacteroidetes	Sphingobacteriia	Sphingobacteriales	Chitinophagaceae	Ferruginibacter	0	0	0	0	0.002	0.004	0	0	0	0.036	0	0	0.001	0	0.001	0	0	0	0.001	0	0	0	0	0	0	0	0	0	0
Bacteria	Bacteroidetes	Sphingobacteriia	Sphingobacteriales	Sphingobacteriaceae	Mucilaginibacter	0	0	0	0	0.001	0	0	0	0	0	0	0	0	0	0.006	0	0	0	0	0	0	0	0.037	0	0	0	0	0	0
Bacteria	Bacteroidetes	Bacteroidia	Bacteroidales	Other	Other	0	0	0	0	0	0	0	0	0	0	0	0	0	0	0	0	0	0	0	0	0	0	0	0	0	0	0	0	0
Bacteria	Bacteroidetes	Bacteroidia	Bacteroidales	Prevotellaceae	Alloprevotella	0	0	0	0	0	0	0	0	0	0	0	0.001	0	0	0	0	0	0	0	0	0	0	0	0	0	0	0	0	0
Bacteria	Bacteroidetes	Flavobacteriia	Flavobacteriales	Flavobacteriaceae	Chryseobacterium	0	0	0	0	0	0	0	0	0	0	0	0.002	0	0	0	0	0	0	0	0	0	0	0	0	0	0	0	0	0
Bacteria	Bacteroidetes	Flavobacteriia	Flavobacteriales	Flavobacteriaceae	Other	0	0	0	0	0	0	0	0	0	0	0	0.002	0	0	0	0	0	0	0	0	0	0	0	0	0	0	0	0	0
Bacteria	Bacteroidetes	Other	Other	Other	Other	0	0	0	0	0.001	0	0	0	0	0.001	0	0	0	0	0	0	0	0.001	0	0	0	0	0	0	0	0	0	0	0
Bacteria	Bacteroidetes	Sphingobacteriia	Sphingobacteriales	Chitinophagaceae	Chitinophaga	0	0	0	0	0	0	0	0	0	0	0	0	0	0	0	0	0	0	0	0	0	0	0	0	0	0	0	0	0
Bacteria	Bacteroidetes	Sphingobacteriia	Sphingobacteriales	Chitinophagaceae	Filimonas	0	0	0	0	0	0	0	0	0	0	0	0	0	0	0	0	0	0	0	0	0	0	0	0	0	0	0	0	0
Bacteria	Bacteroidetes	Sphingobacteriia	Sphingobacteriales	Chitinophagaceae	Flavitalea	0	0	0	0	0	0	0	0	0	0	0	0	0	0	0	0	0	0	0	0	0	0	0	0	0	0	0	0	0
Bacteria	Bacteroidetes	Sphingobacteriia	Sphingobacteriales	Chitinophagaceae	Niastella	0	0	0	0	0	0	0	0	0	0	0	0.002	0.001	0.001	0.001	0	0	0.002	0	0	0	0	0.001	0	0	0	0	0	0
Bacteria	Bacteroidetes	Sphingobacteriia	Sphingobacteriales	Chitinophagaceae	Terrimonas	0	0	0	0	0	0	0	0	0	0	0	0	0	0	0	0	0	0	0	0	0	0	0	0	0	0	0	0	0
Bacteria	Bacteroidetes	Sphingobacteriia	Sphingobacteriales	Other	Other	0	0	0	0	0.001	0.001	0	0	0	0.002	0	0	0	0	0	0	0	0	0	0	0	0	0	0	0.001	0	0	0	0
Bacteria	Bacteroidetes	Sphingobacteriia	Sphingobacteriales	Sphingobacteriaceae	Pedobacter	0	0	0	0	0	0	0	0	0	0	0	0	0	0	0	0	0	0	0	0	0	0	0	0.002	0	0	0	0	0
Bacteria	candidate division WPS-1	WPS-1_genera_incertae_sedis	WPS-1_genera_incertae_sedis	WPS-1_genera_incertae_sedis	WPS-1_genera_incertae_sedis	0	0	0	0	0.001	0.001	0	0	0	0	0	0	0	0	0.001	0	0	0	0	0	0	0	0	0	0	0	0	0	0
Bacteria	candidate division WPS-2	WPS-2_genera_incertae_sedis	WPS-2_genera_incertae_sedis	WPS-2_genera_incertae_sedis	WPS-2_genera_incertae_sedis	0	0	0	0	0.001	0.002	0	0	0	0	0	0	0	0	0	0	0	0	0.001	0	0	0	0	0	0.006	0	0	0	0
Bacteria	Candidatus Saccharibacteria	Saccharibacteria_genera_incertae_sedis	Saccharibacteria_genera_incertae_sedis	Saccharibacteria_genera_incertae_sedis	Saccharibacteria_genera_incertae_sedis	0	0	0	0	0	0	0	0	0	0	0	0	0	0	0	0	0	0	0	0	0	0	0	0	0	0	0	0	0
Bacteria	Chlamydiae	Chlamydiia	Chlamydiales	Other	Other	0	0	0	0	0	0	0	0	0	0	0	0	0	0	0	0	0	0	0	0	0.001	0.001	0	0	0	0	0.001	0	0.001
Bacteria	Chlamydiae	Chlamydiia	Chlamydiales	Parachlamydiaceae	Neochlamydia	0	0	0	0	0	0	0	0	0	0	0	0	0	0	0	0	0	0	0	0	0	0	0	0	0	0	0	0	0
Bacteria	Chlamydiae	Chlamydiia	Chlamydiales	Parachlamydiaceae	Other	0	0	0	0	0	0	0	0	0	0	0	0	0	0	0	0	0	0	0	0	0	0.001	0	0	0	0	0	0	0
Bacteria	Chlamydiae	Chlamydiia	Chlamydiales	Parachlamydiaceae	Parachlamydia	0	0	0	0	0	0	0	0	0	0	0	0	0	0	0	0	0	0.001	0	0.001	0.001	0.001	0	0	0	0	0.005	0	0
Bacteria	Chlamydiae	Chlamydiia	Chlamydiales	Simkaniaceae	Simkania	0	0	0	0	0	0	0	0	0	0	0	0	0	0	0	0	0	0	0	0	0	0	0	0	0	0	0	0	0
Bacteria	Chloroflexi	Ktedonobacteria	Ktedonobacterales	Ktedonobacteraceae	Ktedonobacter	0.057	0.067	0.09	0.075	0.071	0.075	0.062	0.188	0.117	0.007	0.064	0.029	0.179	0.066	0.019	0.111	0.237	0.059	0.137	0.066	0.033	0.049	0.008	0.027	0.101	0.255	0.069	0.029	0.028
Bacteria	Chloroflexi	Ktedonobacteria	Ktedonobacterales	Other	Other	0.021	0.022	0.011	0.016	0.026	0.027	0.043	0.011	0.068	0	0.002	0.002	0.004	0.036	0.036	0.051	0.041	0.007	0.037	0.027	0.009	0.037	0.001	0.039	0.063	0.009	0.029	0.051	0.016
Bacteria	Chloroflexi	Ktedonobacteria	Other	Other	Other	0.031	0.032	0.036	0.015	0.003	0.004	0.015	0.018	0.042	0	0.003	0.011	0.001	0.03	0.003	0.13	0.045	0	0.082	0.021	0.009	0.016	0	0.001	0.014	0.003	0.03	0.013	0.009
Bacteria	Chloroflexi	Ktedonobacteria	Ktedonobacterales	Thermosporotrichaceae	Thermosporothrix	0.01	0.013	0.006	0.006	0	0	0.088	0.021	0.005	0	0.004	0.012	0.004	0.015	0.031	0.003	0.017	0.008	0.016	0.012	0.004	0.002	0	0	0.045	0.026	0.005	0.003	0.002
Bacteria	Chloroflexi	Other	Other	Other	Other	0.026	0.023	0.003	0.003	0.015	0.011	0.001	0.004	0.015	0.009	0.006	0.004	0.001	0.013	0.008	0.001	0.032	0	0.003	0.009	0.009	0.008	0	0	0	0.001	0.008	0	0.001
Bacteria	Chloroflexi	Ktedonobacteria	Thermogemmatisporales	Thermogemmatisporaceae	Thermogemmatispora	0.007	0.007	0.001	0.001	0.028	0.017	0	0.003	0.006	0	0	0.003	0	0.004	0	0.001	0	0.003	0.006	0.014	0	0.016	0	0.034	0.006	0	0.004	0	0
Bacteria	Chloroflexi	Anaerolineae	Anaerolineales	Anaerolineaceae	Other	0	0.001	0.001	0	0	0	0	0	0	0	0	0	0	0	0	0	0	0	0	0	0	0	0	0	0	0	0	0	0
Archaea	Crenarchaeota	Thermoprotei	Thermoproteales	Other	Other	0.002	0.002	0.001	0	0	0	0	0	0	0	0	0	0.001	0	0	0	0	0	0	0	0	0	0	0	0	0	0.001	0	0
Archaea	Crenarchaeota	Thermoprotei	Other	Other	Other	0	0	0	0	0	0	0	0	0	0	0	0	0	0	0	0	0	0	0	0	0	0	0.001	0	0	0	0.001	0	0.003
Bacteria	Elusimicrobia	Elusimicrobia	Elusimicrobiales	Elusimicrobiaceae	Elusimicrobium	0	0.001	0.001	0.001	0	0	0	0	0.001	0.033	0	0	0	0	0	0.001	0.002	0	0.001	0	0	0.001	0	0	0	0	0.004	0	0
Bacteria	Elusimicrobia	Other	Other	Other	Other	0	0	0	0.001	0	0	0	0	0	0.001	0	0	0	0	0	0	0	0	0	0	0	0	0	0	0	0	0	0	0
Archaea	Euryarchaeota	Thermoplasmata	Methanomassiliicoccales	Methanomassiliicoccaceae	Methanomassiliicoccus	0.002	0.001	0.002	0.001	0.005	0.004	0	0	0.007	0.004	0	0.004	0	0.002	0.001	0.002	0.001	0	0.027	0.006	0	0.011	0.002	0	0.005	0	0.014	0	0
Archaea	Euryarchaeota	Other	Other	Other	Other	0	0	0	0	0	0	0	0	0	0	0	0	0	0	0	0	0	0	0.001	0	0	0	0	0	0	0	0	0	0
Bacteria	Firmicutes	Clostridia	Other	Other	Other	0.002	0.001	0.006	0.01	0.003	0.005	0	0.002	0.001	0	0.004	0.003	0.001	0.002	0.003	0.002	0.004	0.002	0.001	0.006	0.005	0.011	0.004	0.002	0.009	0.001	0.003	0.001	0.007
Bacteria	Firmicutes	Other	Other	Other	Other	0.004	0.004	0.002	0.002	0.007	0.006	0.01	0.047	0.001	0	0.006	0	0.002	0.005	0.009	0.001	0.002	0.004	0.001	0.004	0.016	0.031	0.007	0.007	0.029	0.001	0.003	0.034	0.003
Bacteria	Firmicutes	Negativicutes	Selenomonadales	Other	Other	0	0.001	0	0	0.002	0.002	0	0	0	0	0	0.005	0.001	0.001	0.002	0	0	0.001	0.001	0	0	0	0	0	0	0	0	0	0
Bacteria	Firmicutes	Clostridia	Thermoanaerobacterales	Other	Other	0.001	0	0	0	0.001	0.001	0	0.001	0	0	0	0	0	0	0.001	0	0	0.001	0	0.001	0.001	0.001	0	0	0.009	0	0	0.001	0
Bacteria	Firmicutes	Bacilli	Bacillales	Bacillaceae 1	Bacillus	0	0	0	0	0.001	0.001	0	0.001	0.005	0	0.001	0.036	0	0	0	0.001	0	0	0.001	0.003	0	0.001	0	0.001	0	0.002	0	0	0
Bacteria	Firmicutes	Bacilli	Bacillales	Paenibacillaceae 1	Paenibacillus	0	0	0	0	0	0	0	0	0	0	0	0	0	0	0	0	0.004	0.016	0	0	0	0	0.001	0	0	0	0	0	0
Bacteria	Firmicutes	Bacilli	Bacillales	Planococcaceae	Lysinibacillus	0	0	0	0	0	0	0	0	0.004	0	0	0.023	0	0	0	0.001	0	0	0.001	0.003	0	0.001	0	0	0	0.001	0	0	0.001
Bacteria	Firmicutes	Bacilli	Bacillales	Bacillaceae 1	Other	0	0	0	0	0	0	0	0	0	0	0	0	0	0	0	0	0	0	0	0	0	0	0	0	0	0	0	0	0
Bacteria	Firmicutes	Bacilli	Bacillales	Paenibacillaceae 1	Cohnella	0	0	0	0	0	0	0	0	0	0	0	0	0	0	0	0	0	0.001	0	0	0	0	0	0	0	0	0	0	0
Bacteria	Firmicutes	Bacilli	Bacillales	Paenibacillaceae 1	Fontibacillus	0	0	0	0	0	0	0	0	0	0	0	0	0	0	0	0	0	0	0	0	0	0	0	0	0	0	0	0	0
Bacteria	Firmicutes	Bacilli	Bacillales	Paenibacillaceae 2	Oxalophagus	0	0	0	0	0	0	0	0	0.001	0	0	0	0	0	0	0	0	0	0	0.001	0	0	0	0	0	0	0	0	0
Bacteria	Firmicutes	Bacilli	Bacillales	Planococcaceae	Other	0	0	0	0	0	0	0	0	0	0	0	0.006	0	0	0	0	0	0	0	0	0	0	0	0	0	0	0	0	0
Bacteria	Firmicutes	Bacilli	Bacillales	Staphylococcaceae	Staphylococcus	0	0	0	0	0	0	0	0	0	0	0	0.004	0	0	0	0	0	0	0	0	0	0	0	0	0	0	0	0	0
Bacteria	Firmicutes	Bacilli	Lactobacillales	Lactobacillaceae	Lactobacillus	0	0	0	0	0	0	0	0	0	0	0	0	0	0	0	0	0	0	0	0	0	0	0	0	0	0	0	0	0
Bacteria	Firmicutes	Bacilli	Lactobacillales	Streptococcaceae	Streptococcus	0	0	0	0	0	0	0	0	0	0	0	0.003	0	0	0	0	0	0	0	0.001	0	0	0	0	0	0	0	0	0
Bacteria	Firmicutes	Clostridia	Clostridiales	Clostridiaceae 1	Clostridium sensu stricto	0	0	0	0	0	0	0	0	0	0	0	0.005	0	0	0	0	0	0	0	0	0	0	0	0	0	0	0	0	0
Bacteria	Firmicutes	Clostridia	Clostridiales	Other	Other	0	0	0	0	0	0	0	0	0	0	0	0	0	0	0	0	0	0	0	0	0	0	0	0	0	0	0	0	0
Bacteria	Firmicutes	Clostridia	Clostridiales	Peptostreptococcaceae	Other	0	0	0	0	0	0	0	0	0	0	0	0	0	0	0	0	0	0.001	0	0	0	0	0	0	0	0	0	0	0
Bacteria	Firmicutes	Clostridia	Thermoanaerobacterales	Thermoanaerobacteraceae	Other	0	0	0	0	0.001	0.001	0	0	0	0	0	0	0	0	0	0	0	0	0	0	0	0	0	0	0	0	0	0	0
Bacteria	Firmicutes	Negativicutes	Selenomonadales	Veillonellaceae	Other	0	0	0	0	0	0	0	0	0	0	0	0	0	0	0	0	0	0	0	0	0	0	0	0	0	0	0	0	0
Bacteria	Fusobacteria	Fusobacteriia	Fusobacteriales	Fusobacteriaceae	Fusobacterium	0	0	0	0	0	0	0	0	0	0	0	0.005	0	0	0	0	0	0	0	0	0	0	0	0	0	0	0	0	0
Bacteria	Gemmatimonadetes	Gemmatimonadetes	Gemmatimonadales	Gemmatimonadaceae	Gemmatimonas	0.001	0.001	0	0	0.002	0.002	0.001	0.002	0	0	0.001	0.004	0.004	0	0	0	0	0	0	0	0	0	0	0	0	0	0	0.009	0
Bacteria	Ignavibacteriae	Ignavibacteria	Ignavibacteriales	Ignavibacteriaceae	Ignavibacterium	0	0	0	0	0	0	0	0	0	0	0	0	0.004	0	0.001	0	0	0	0	0	0	0	0	0	0	0	0	0.002	0
Bacteria	Nitrospirae	Nitrospira	Nitrospirales	Nitrospiraceae	Nitrospira	0.016	0.012	0.062	0.089	0	0	0	0	0.004	0.047	0.005	0.03	0.048	0.021	0.006	0.043	0.04	0.027	0.015	0.015	0.015	0.016	0.004	0	0	0.001	0.022	0.001	0.04
Bacteria	Other	Other	Other	Other	Other	0.084	0.084	0.072	0.113	0.057	0.039	0.055	0.05	0.033	0.064	0.048	0.073	0.068	0.054	0.035	0.041	0.061	0.155	0.039	0.096	0.093	0.138	0.035	0.046	0.08	0.018	0.099	0.041	0.101
Archaea	Other	Other	Other	Other	Other	0.002	0.001	0.002	0.002	0.001	0	0	0	0	0.001	0	0	0	0	0.002	0.001	0.001	0.001	0	0	0	0.001	0	0	0	0	0.001	0	0.016
Unclassified	Other	Other	Other	Other	Other	0	0	0	0	0	0	0	0	0	0	0	0.008	0	0	0.004	0	0	0	0	0.001	0.009	0	0.004	0	0.001	0	0	0.005	0
Bacteria	Planctomycetes	Planctomycetia	Planctomycetales	Planctomycetaceae	Gemmata	0.004	0.005	0.004	0.003	0.004	0.005	0.002	0.005	0.004	0	0.005	0.008	0.002	0.004	0.002	0.002	0.001	0.004	0.001	0.003	0.008	0.009	0.001	0.001	0.004	0.019	0.009	0.004	0.004
Bacteria	Planctomycetes	Planctomycetia	Planctomycetales	Planctomycetaceae	Zavarzinella	0.001	0.002	0	0.001	0.001	0.001	0	0.001	0.001	0	0.002	0	0.001	0.001	0	0	0	0.001	0	0.001	0.001	0.001	0	0.001	0	0.013	0.003	0.002	0
Bacteria	Planctomycetes	Planctomycetia	Planctomycetales	Planctomycetaceae	Other	0	0	0	0.001	0.001	0.002	0	0	0.001	0	0	0	0	0.001	0	0	0	0.001	0.001	0.001	0.004	0.003	0	0.001	0.001	0	0.002	0.001	0.002
Bacteria	Planctomycetes	Planctomycetia	Planctomycetales	Planctomycetaceae	Planctomyces	0.001	0.001	0	0	0.001	0.003	0	0	0	0.002	0	0	0.001	0	0.001	0	0	0	0.001	0.001	0.001	0.001	0	0.001	0.001	0	0.001	0	0
Bacteria	Planctomycetes	Planctomycetia	Other	Other	Other	0	0	0	0	0	0	0	0	0	0	0	0	0	0	0	0	0	0	0	0	0	0	0	0	0	0	0	0	0
Bacteria	Planctomycetes	Planctomycetia	Planctomycetales	Planctomycetaceae	Aquisphaera	0	0	0	0	0.001	0	0	0	0	0	0	0	0	0	0	0	0	0	0	0	0	0	0	0	0	0	0	0	0
Bacteria	Planctomycetes	Planctomycetia	Planctomycetales	Planctomycetaceae	Blastopirellula	0	0	0	0	0	0	0	0	0	0	0	0	0	0	0	0	0	0	0	0	0	0	0	0	0	0	0	0	0
Bacteria	Proteobacteria	Betaproteobacteria	Other	Other	Other	0.001	0.001	0.036	0.013	0	0	0	0	0	0.041	0.001	0.003	0.012	0.002	0.005	0.009	0.014	0.003	0.001	0.002	0.013	0.019	0.003	0	0.002	0	0.008	0.001	0.013
Bacteria	Proteobacteria	Deltaproteobacteria	Myxococcales	Cystobacteraceae	Other	0.003	0.002	0.004	0.013	0	0	0	0	0	0	0.003	0	0.008	0.002	0.001	0.003	0.006	0.003	0	0	0.001	0	0	0	0	0	0.009	0	0.002
Bacteria	Proteobacteria	Gammaproteobacteria	Xanthomonadales	Sinobacteraceae	Steroidobacter	0.013	0.011	0.008	0.011	0.007	0.006	0.001	0	0.002	0.006	0.024	0.002	0.013	0.001	0.003	0.003	0.003	0.006	0.002	0.004	0.001	0.004	0.001	0	0.001	0.002	0.001	0.003	0.001
Bacteria	Proteobacteria	Deltaproteobacteria	Other	Other	Other	0.004	0.004	0.012	0.01	0.005	0.006	0.002	0.001	0.009	0.006	0.003	0	0.005	0.009	0.007	0.014	0.019	0.008	0.009	0.01	0.007	0.009	0.005	0.003	0.003	0.002	0.024	0.013	0.005
Bacteria	Proteobacteria	Alphaproteobacteria	Rhizobiales	Beijerinckiaceae	Other	0.006	0.007	0.007	0.01	0.002	0.002	0.005	0.028	0.004	0	0.014	0.005	0.009	0.019	0.021	0	0	0.007	0.002	0.031	0.038	0.048	0.01	0.009	0.004	0.008	0	0.102	0.057
Bacteria	Proteobacteria	Alphaproteobacteria	Rhodospirillales	Rhodospirillaceae	Other	0	0	0.004	0.008	0.001	0.001	0.004	0.004	0.002	0.004	0.001	0	0.013	0.007	0.007	0.001	0	0.022	0.003	0.002	0.012	0.006	0.006	0.001	0.003	0.006	0.004	0.017	0.006
Bacteria	Proteobacteria	Deltaproteobacteria	Myxococcales	Cystobacteraceae	Cystobacter	0.001	0.001	0.006	0.007	0	0	0	0	0	0	0.006	0.005	0.008	0.008	0.001	0.003	0.002	0.003	0	0	0.003	0	0	0	0	0	0.006	0	0.01
Bacteria	Proteobacteria	Gammaproteobacteria	Other	Other	Other	0.003	0.006	0.004	0.006	0.021	0.03	0.009	0.001	0.025	0.003	0.012	0.007	0.003	0.005	0.015	0.002	0.004	0.012	0.011	0.012	0.007	0.012	0.003	0.004	0.007	0.008	0.008	0.006	0.004
Bacteria	Proteobacteria	Deltaproteobacteria	Myxococcales	Cystobacteraceae	Anaeromyxobacter	0.005	0.004	0.005	0.005	0	0	0	0	0	0.001	0.001	0.004	0.002	0	0	0	0	0.001	0	0	0	0.001	0	0	0	0	0.001	0	0.001
Bacteria	Proteobacteria	Betaproteobacteria	Burkholderiales	Other	Other	0.002	0.003	0.005	0.003	0.001	0	0	0	0.001	0.014	0.005	0	0.006	0	0	0.001	0.003	0.001	0.001	0.004	0.001	0.011	0.012	0	0	0	0.001	0	0
Bacteria	Proteobacteria	Betaproteobacteria	Rhodocyclales	Rhodocyclaceae	Other	0.002	0.002	0.003	0.003	0	0	0	0	0	0	0	0	0.007	0	0	0	0.001	0	0	0	0.002	0.001	0	0	0	0	0	0	0
Bacteria	Proteobacteria	Alphaproteobacteria	Other	Other	Other	0.001	0.001	0.003	0.003	0.004	0.007	0.004	0.032	0	0.004	0.002	0	0.003	0.002	0.004	0	0	0.004	0.001	0.002	0.014	0.015	0.008	0.011	0.006	0.005	0	0.048	0.007
Bacteria	Proteobacteria	Other	Other	Other	Other	0.001	0.001	0.003	0.003	0.001	0.001	0.002	0.001	0.002	0.016	0.001	0.007	0.002	0.002	0.001	0.002	0.003	0.004	0.003	0.003	0.002	0.002	0.001	0	0.001	0.001	0.004	0.001	0.001
Bacteria	Proteobacteria	Deltaproteobacteria	Syntrophobacterales	Syntrophobacteraceae	Desulfacinum	0	0	0.002	0.003	0	0	0	0	0	0	0	0	0	0	0	0	0	0	0	0	0	0	0	0	0	0	0	0	0
Bacteria	Proteobacteria	Alphaproteobacteria	Rhizobiales	Other	Other	0.005	0.005	0.004	0.002	0.006	0.01	0.004	0.007	0.012	0.016	0.005	0.004	0.002	0.005	0.012	0.001	0.004	0.002	0.002	0.009	0.008	0.014	0.019	0.003	0.002	0.004	0.008	0.022	0.006
Bacteria	Proteobacteria	Alphaproteobacteria	Alphaproteobacteria_incertae_sedis	Rhizomicrobium	Rhizomicrobium	0.001	0.003	0.002	0.002	0.023	0.017	0.002	0.002	0.007	0.007	0.001	0.012	0.003	0.002	0.019	0.001	0	0.004	0.012	0.006	0.003	0.002	0.003	0.005	0.01	0.002	0.004	0	0
Bacteria	Proteobacteria	Alphaproteobacteria	Rhodospirillales	Acetobacteraceae	Other	0.001	0.002	0.001	0.002	0.007	0.013	0.003	0.002	0.01	0.006	0.002	0.004	0.002	0.003	0.004	0.001	0	0.002	0.006	0.018	0.002	0.005	0	0.001	0.008	0.005	0.006	0.001	0
Bacteria	Proteobacteria	Alphaproteobacteria	Rhizobiales	Hyphomicrobiaceae	Rhodomicrobium	0	0	0.001	0.002	0.001	0.001	0.002	0.002	0	0.003	0	0	0	0	0.001	0	0.001	0	0	0	0.002	0	0	0	0	0	0.001	0.002	0
Bacteria	Proteobacteria	Alphaproteobacteria	Rhizobiales	Bradyrhizobiaceae	Other	0.004	0.003	0.002	0.001	0.003	0.006	0	0	0.007	0.012	0.003	0.004	0.001	0.003	0.012	0.001	0.006	0.001	0.001	0.001	0.001	0.005	0	0	0	0.002	0.01	0	0
Bacteria	Proteobacteria	Alphaproteobacteria	Rhizobiales	Hyphomicrobiaceae	Rhodoplanes	0.005	0.006	0.001	0.001	0.012	0.019	0.01	0.014	0.015	0.005	0.005	0.006	0.001	0.004	0.008	0.001	0.001	0.002	0.007	0.02	0.004	0.006	0.001	0.003	0.011	0.007	0.007	0.01	0.001
Bacteria	Proteobacteria	Alphaproteobacteria	Rhizobiales	Hyphomicrobiaceae	Blastochloris	0.003	0.004	0.001	0.001	0.007	0.009	0	0	0.002	0	0.003	0.005	0	0.001	0	0	0	0	0.001	0.001	0.001	0.002	0.001	0	0	0	0.001	0	0
Bacteria	Proteobacteria	Deltaproteobacteria	Myxococcales	Other	Other	0.001	0.002	0.001	0.001	0.001	0.002	0	0	0	0.001	0.001	0.011	0.002	0	0	0.001	0	0.001	0	0	0	0	0	0	0	0	0	0	0
Bacteria	Proteobacteria	Gammaproteobacteria	Chromatiales	Other	Other	0.001	0.001	0.001	0.001	0.002	0.001	0.001	0	0	0	0.001	0.003	0.001	0.001	0.002	0	0	0.003	0.002	0.002	0.001	0	0.003	0	0	0	0	0	0
Bacteria	Proteobacteria	Alphaproteobacteria	Rhizobiales	Hyphomicrobiaceae	Pedomicrobium	0.001	0.001	0.001	0.001	0	0	0	0	0.001	0.001	0	0	0	0	0	0	0.001	0.001	0	0.002	0	0.002	0	0	0	0	0.001	0	0.001
Bacteria	Proteobacteria	Alphaproteobacteria	Rhodospirillales	Other	Other	0	0.001	0.001	0.001	0.002	0.004	0.001	0.003	0.001	0.001	0.001	0.005	0.003	0.001	0.002	0.001	0	0.002	0.001	0.004	0.002	0.003	0.001	0.002	0	0	0.003	0.001	0.001
Bacteria	Proteobacteria	Deltaproteobacteria	Bdellovibrionales	Bdellovibrionaceae	Vampirovibrio	0	0	0.001	0.001	0.001	0.002	0	0	0	0.002	0.001	0	0	0	0.002	0	0	0.001	0	0	0.002	0.001	0.003	0.002	0.006	0	0.001	0.001	0.002
Bacteria	Proteobacteria	Deltaproteobacteria	Bdellovibrionales	Bacteriovoracaceae	Bacteriovorax	0	0	0.001	0.001	0	0	0	0	0	0	0	0	0	0	0	0	0	0	0	0	0	0	0	0	0	0	0	0	0
Bacteria	Proteobacteria	Alphaproteobacteria	Rhizobiales	Bradyrhizobiaceae	Bradyrhizobium	0.002	0.002	0	0.001	0.002	0.003	0.002	0.003	0	0.001	0.002	0.085	0.002	0.001	0.007	0	0	0.005	0.001	0.002	0.003	0.001	0.005	0.003	0.001	0.001	0.001	0.001	0
Bacteria	Proteobacteria	Betaproteobacteria	Burkholderiales	Burkholderiaceae	Cupriavidus	0	0	0	0.001	0	0	0	0	0	0	0	0.006	0.002	0	0	0.001	0	0.018	0	0.001	0.001	0.001	0.011	0	0	0	0	0	0
Bacteria	Proteobacteria	Betaproteobacteria	Nitrosomonadales	Nitrosomonadaceae	Nitrosospira	0	0	0.003	0	0	0	0	0	0	0	0	0.004	0.004	0.001	0	0.003	0.002	0.007	0	0.003	0.001	0	0	0	0	0	0.001	0	0
Bacteria	Proteobacteria	Gammaproteobacteria	Xanthomonadales	Other	Other	0.001	0.002	0.001	0	0.005	0.008	0.004	0.001	0.001	0	0.006	0	0.001	0	0.007	0	0.001	0	0	0.001	0	0.001	0	0.002	0.003	0.004	0	0	0
Bacteria	Proteobacteria	Betaproteobacteria	Burkholderiales	Burkholderiaceae	Burkholderia	0.002	0.003	0	0	0.006	0.001	0	0	0	0	0.001	0.019	0.001	0.001	0.005	0	0	0.05	0	0.008	0.004	0.002	0.263	0	0	0	0.001	0.002	0
Bacteria	Proteobacteria	Deltaproteobacteria	Syntrophobacterales	Other	Other	0.001	0.002	0	0	0.001	0	0	0	0	0	0.001	0	0	0.001	0	0	0	0.001	0.002	0.001	0.001	0.001	0	0	0	0	0.001	0.003	0.001
Bacteria	Proteobacteria	Deltaproteobacteria	Myxococcales	Polyangiaceae	Other	0.001	0.001	0	0	0.002	0.003	0	0	0.001	0.001	0.001	0	0.001	0.001	0.001	0	0	0.001	0.001	0	0	0	0	0	0.001	0	0	0	0
Bacteria	Proteobacteria	Alphaproteobacteria	Caulobacterales	Caulobacteraceae	Phenylobacterium	0	0.001	0	0	0.002	0.001	0	0	0	0.001	0	0.021	0.001	0	0.003	0	0	0.001	0	0	0	0	0	0.001	0.003	0	0	0	0
Bacteria	Proteobacteria	Alphaproteobacteria	Rhizobiales	Rhizobiaceae	Rhizobium	0	0	0	0	0	0	0	0	0	0	0	0.003	0	0	0	0	0	0	0	0	0	0	0.117	0	0	0	0	0	0
Bacteria	Proteobacteria	Alphaproteobacteria	Rhodospirillales	Acetobacteraceae	Acidisoma	0	0	0	0	0.001	0.001	0.013	0.019	0	0	0	0.004	0	0	0.001	0	0	0	0.001	0	0.001	0	0	0.001	0.006	0.025	0	0.001	0
Bacteria	Proteobacteria	Betaproteobacteria	Burkholderiales	Oxalobacteraceae	Glaciimonas	0	0	0	0	0	0	0	0	0	0	0	0	0.003	0	0	0	0.002	0.001	0	0.001	0	0.001	0.035	0	0	0	0	0	0
Bacteria	Proteobacteria	Deltaproteobacteria	Desulfuromonadales	Geobacteraceae	Geobacter	0	0	0	0	0	0	0	0	0	0.042	0	0.004	0	0	0	0	0	0	0	0	0	0	0	0	0	0	0	0	0
Bacteria	Proteobacteria	Alphaproteobacteria	Rhizobiales	Beijerinckiaceae	Methylocapsa	0	0	0	0	0	0	0	0.002	0	0	0	0	0	0	0	0	0	0	0	0	0.001	0.001	0	0	0	0	0	0.016	0.001
Bacteria	Proteobacteria	Betaproteobacteria	Burkholderiales	Burkholderiaceae	Ralstonia	0	0	0	0	0	0	0	0	0	0	0	0.011	0	0	0	0	0	0	0	0	0	0	0.009	0	0	0	0	0	0
Bacteria	Proteobacteria	Betaproteobacteria	Burkholderiales	Comamonadaceae	Variovorax	0	0	0	0	0.001	0	0	0	0	0	0	0	0.001	0	0	0	0	0.01	0	0	0	0	0.003	0	0	0	0	0	0
Bacteria	Proteobacteria	Gammaproteobacteria	Pseudomonadales	Pseudomonadaceae	Pseudomonas	0	0	0	0	0	0	0	0	0	0	0	0.03	0	0	0	0	0	0	0	0	0	0	0	0	0	0	0	0	0
Bacteria	Proteobacteria	Gammaproteobacteria	Xanthomonadales	Xanthomonadaceae	Dokdonella	0	0	0	0	0	0	0	0	0	0	0	0	0	0	0	0	0	0	0	0.002	0.001	0	0	0.001	0	0.021	0	0	0
Bacteria	Proteobacteria	Gammaproteobacteria	Xanthomonadales	Xanthomonadaceae	Dyella	0	0	0	0	0.002	0	0.001	0	0	0	0	0	0	0	0.003	0	0	0.001	0	0.001	0	0	0.004	0	0	0	0	0.001	0
Bacteria	Proteobacteria	Alphaproteobacteria	Caulobacterales	Caulobacteraceae	Caulobacter	0	0	0	0	0	0	0	0	0	0	0	0	0	0	0	0	0	0	0	0	0	0	0	0	0	0	0	0	0
Bacteria	Proteobacteria	Alphaproteobacteria	Rhizobiales	Beijerinckiaceae	Beijerinckia	0	0	0	0	0	0	0	0	0	0	0	0	0	0	0.002	0	0	0	0	0	0	0	0	0	0.001	0	0	0	0
Bacteria	Proteobacteria	Alphaproteobacteria	Rhizobiales	Bradyrhizobiaceae	Afipia	0	0	0	0	0	0	0	0	0	0	0	0	0	0	0	0	0	0	0	0	0	0	0.005	0	0	0	0	0	0
Bacteria	Proteobacteria	Alphaproteobacteria	Rhizobiales	Hyphomicrobiaceae	Hyphomicrobium	0	0	0	0	0	0	0	0	0	0	0	0	0.001	0	0	0	0	0	0	0	0.001	0.001	0	0.001	0	0	0	0	0.001
Bacteria	Proteobacteria	Alphaproteobacteria	Rhizobiales	Hyphomicrobiaceae	Other	0	0	0	0	0	0	0	0.001	0	0.001	0	0	0	0	0	0	0	0	0	0	0	0	0	0	0	0	0	0	0
Bacteria	Proteobacteria	Alphaproteobacteria	Rhizobiales	Methylocystaceae	Methylocystis	0	0	0	0	0	0	0.002	0	0	0	0	0	0	0	0	0	0	0	0	0	0	0	0	0	0	0	0	0	0
Bacteria	Proteobacteria	Alphaproteobacteria	Rhizobiales	Methylocystaceae	Other	0	0	0	0	0.001	0.001	0	0	0	0	0	0	0	0	0.001	0	0	0	0	0	0.001	0	0.001	0	0	0.001	0	0	0
Bacteria	Proteobacteria	Alphaproteobacteria	Rhizobiales	Phyllobacteriaceae	Aminobacter	0	0	0	0	0	0	0	0	0	0	0	0	0	0	0	0	0	0.001	0	0	0	0	0.001	0	0	0	0	0	0
Bacteria	Proteobacteria	Alphaproteobacteria	Rhizobiales	Phyllobacteriaceae	Thermovum	0	0	0	0	0	0	0	0	0	0	0	0	0	0	0	0	0	0	0	0	0	0	0	0	0	0	0	0	0
Bacteria	Proteobacteria	Alphaproteobacteria	Rhizobiales	Rhizobiales_incertae_sedis	Bauldia	0	0	0	0	0	0	0	0	0	0	0	0	0	0	0	0	0	0	0	0	0	0	0	0	0	0	0	0.001	0
Bacteria	Proteobacteria	Alphaproteobacteria	Rhizobiales	Xanthobacteraceae	Other	0	0	0	0	0	0	0	0	0	0	0	0	0	0	0	0	0	0	0	0	0	0	0	0	0	0	0	0	0
Bacteria	Proteobacteria	Alphaproteobacteria	Rhizobiales	Xanthobacteraceae	Pseudolabrys	0	0	0	0	0	0	0	0	0	0	0.001	0	0.001	0	0	0	0	0	0	0	0	0	0	0.001	0	0	0	0	0
Bacteria	Proteobacteria	Alphaproteobacteria	Rhodospirillales	Acetobacteraceae	Acidocella	0	0	0	0	0	0	0	0	0	0	0	0	0	0	0	0	0	0	0	0	0	0	0.002	0	0	0	0	0	0
Bacteria	Proteobacteria	Alphaproteobacteria	Rhodospirillales	Acetobacteraceae	Granulibacter	0	0	0	0	0	0	0	0	0	0	0	0	0	0	0	0	0	0	0	0	0	0	0	0	0.005	0	0	0	0
Bacteria	Proteobacteria	Alphaproteobacteria	Rhodospirillales	Acetobacteraceae	Stella	0	0	0	0	0	0	0	0	0	0	0	0	0	0	0	0	0	0	0	0	0	0	0	0	0	0.004	0	0	0
Bacteria	Proteobacteria	Alphaproteobacteria	Rhodospirillales	Rhodospirillaceae	Dongia	0	0	0	0	0	0	0	0	0	0	0	0	0	0	0	0	0	0.008	0	0	0	0	0	0	0	0	0	0	0
Bacteria	Proteobacteria	Alphaproteobacteria	Rhodospirillales	Rhodospirillaceae	Rhodocista	0	0	0	0	0	0	0	0	0	0	0	0	0	0	0	0	0	0	0	0	0	0	0	0	0	0	0	0	0.001
Bacteria	Proteobacteria	Alphaproteobacteria	Rhodospirillales	Rhodospirillaceae	Skermanella	0	0	0	0	0	0	0	0	0	0.001	0	0	0	0	0	0	0	0	0	0	0	0	0	0	0	0	0	0	0
Bacteria	Proteobacteria	Alphaproteobacteria	Sphingomonadales	Other	Other	0	0	0	0	0.004	0	0	0	0	0	0	0.001	0	0	0	0	0	0	0	0	0	0	0	0	0	0	0	0	0
Bacteria	Proteobacteria	Alphaproteobacteria	Sphingomonadales	Sphingomonadaceae	Novosphingobium	0	0	0	0	0.001	0	0	0	0	0.001	0	0	0	0	0	0	0	0	0	0	0	0	0	0	0	0	0	0	0
Bacteria	Proteobacteria	Alphaproteobacteria	Sphingomonadales	Sphingomonadaceae	Sphingobium	0	0	0	0	0	0	0	0	0	0	0	0.003	0	0	0	0	0	0	0	0	0	0	0	0	0	0	0	0	0
Bacteria	Proteobacteria	Betaproteobacteria	Burkholderiales	Alcaligenaceae	Alcaligenes	0	0	0	0	0	0	0	0	0	0	0	0.001	0	0	0	0	0	0	0	0	0	0	0	0	0	0	0	0	0
Bacteria	Proteobacteria	Betaproteobacteria	Burkholderiales	Burkholderiaceae	Chitinimonas	0	0	0	0	0.001	0	0	0	0	0	0	0	0	0	0	0	0	0	0	0	0	0	0	0	0.004	0	0	0	0
Bacteria	Proteobacteria	Betaproteobacteria	Burkholderiales	Burkholderiaceae	Other	0	0	0	0	0	0	0	0	0	0	0	0	0	0	0	0	0	0	0	0	0	0	0.001	0	0	0	0	0	0
Bacteria	Proteobacteria	Betaproteobacteria	Burkholderiales	Burkholderiaceae	Pandoraea	0	0	0	0	0	0	0	0	0	0	0	0	0	0	0	0	0	0	0	0	0	0	0.005	0	0	0	0	0	0
Bacteria	Proteobacteria	Betaproteobacteria	Burkholderiales	Burkholderiales_incertae_sedis	Aquabacterium	0	0	0	0	0	0	0	0	0	0	0	0.01	0	0	0	0	0	0	0	0	0	0	0	0	0	0	0	0	0
Bacteria	Proteobacteria	Betaproteobacteria	Burkholderiales	Burkholderiales_incertae_sedis	Tepidimonas	0	0	0	0	0	0	0	0	0	0	0	0.009	0	0	0	0	0	0	0	0	0	0	0	0	0	0	0	0	0
Bacteria	Proteobacteria	Betaproteobacteria	Burkholderiales	Comamonadaceae	Delftia	0	0	0	0	0	0	0	0	0	0	0	0.012	0	0	0	0	0	0	0	0	0	0	0	0	0	0	0	0	0
Bacteria	Proteobacteria	Betaproteobacteria	Burkholderiales	Comamonadaceae	Polaromonas	0	0	0	0	0	0	0	0	0	0	0	0	0.006	0	0	0.003	0	0	0	0	0	0	0	0	0	0	0	0	0
Bacteria	Proteobacteria	Betaproteobacteria	Burkholderiales	Comamonadaceae	Schlegelella	0	0	0	0	0	0	0	0	0	0	0	0.002	0	0	0	0	0	0	0	0	0	0	0	0	0	0	0	0	0
Bacteria	Proteobacteria	Betaproteobacteria	Burkholderiales	Oxalobacteraceae	Other	0	0	0	0	0.001	0	0	0	0	0	0	0	0.001	0	0.002	0	0	0.002	0	0	0	0	0.001	0	0.005	0	0	0	0
Bacteria	Proteobacteria	Betaproteobacteria	Ferrovales	Ferrovaceae	Ferrovum	0	0	0	0	0	0	0	0	0	0.001	0	0	0	0	0	0	0	0	0	0	0	0	0	0	0	0	0	0	0
Bacteria	Proteobacteria	Betaproteobacteria	Gallionellales	Gallionellaceae	Sideroxydans	0	0	0	0	0	0	0	0	0	0.006	0	0	0	0	0	0	0	0	0	0	0	0	0	0	0	0	0	0	0
Bacteria	Proteobacteria	Betaproteobacteria	Hydrogenophilales	Hydrogenophilaceae	Hydrogenophilus	0	0	0	0	0	0	0	0	0	0	0	0.002	0	0	0	0	0	0	0	0	0	0	0	0	0	0	0	0	0
Bacteria	Proteobacteria	Betaproteobacteria	Neisseriales	Neisseriaceae	Neisseria	0	0	0	0	0	0	0	0	0	0	0	0.002	0	0	0	0	0	0	0	0	0	0	0	0	0	0	0	0	0
Bacteria	Proteobacteria	Betaproteobacteria	Neisseriales	Neisseriaceae	Other	0	0	0	0	0	0	0	0	0	0	0	0	0	0	0	0	0	0.002	0	0.001	0.001	0	0.002	0	0	0	0	0	0
Bacteria	Proteobacteria	Betaproteobacteria	Neisseriales	Neisseriaceae	Stenoxybacter	0	0	0	0	0	0	0.001	0	0	0	0	0.003	0	0	0	0	0	0	0	0	0	0	0	0	0	0	0	0	0.001
Bacteria	Proteobacteria	Betaproteobacteria	Rhodocyclales	Rhodocyclaceae	Georgfuchsia	0	0	0	0	0.002	0	0	0	0	0.01	0	0	0	0	0	0	0	0	0	0	0	0	0	0	0	0	0	0	0
Bacteria	Proteobacteria	Deltaproteobacteria	Bdellovibrionales	Bdellovibrionaceae	Bdellovibrio	0	0	0	0	0	0	0	0	0	0.001	0	0.003	0	0	0	0	0	0	0	0	0	0	0	0	0	0	0	0	0
Bacteria	Proteobacteria	Deltaproteobacteria	Myxococcales	Haliangiaceae	Haliangium	0	0	0	0	0.001	0.001	0	0	0	0.001	0.001	0	0.001	0	0	0	0	0	0	0	0.001	0	0.001	0	0	0	0	0	0
Bacteria	Proteobacteria	Deltaproteobacteria	Myxococcales	Myxococcaceae	Corallococcus	0	0	0	0	0	0	0	0	0	0	0	0	0	0	0	0	0	0	0	0	0	0	0	0	0	0	0	0	0
Bacteria	Proteobacteria	Deltaproteobacteria	Myxococcales	Myxococcaceae	Other	0	0	0	0	0	0	0	0	0	0	0	0	0	0	0	0	0	0	0	0	0	0	0	0	0	0	0	0	0
Bacteria	Proteobacteria	Deltaproteobacteria	Myxococcales	Polyangiaceae	Jahnella	0	0	0	0	0.001	0	0	0	0	0.001	0	0	0	0	0	0	0	0	0	0	0	0	0	0	0	0	0	0	0
Bacteria	Proteobacteria	Gammaproteobacteria	Enterobacteriales	Enterobacteriaceae	Enterobacter	0	0	0	0	0	0	0	0	0	0	0	0	0	0	0.002	0	0	0	0	0	0	0	0	0	0	0	0	0	0
Bacteria	Proteobacteria	Gammaproteobacteria	Legionellales	Coxiellaceae	Aquicella	0	0	0	0	0	0	0	0	0	0	0	0	0	0	0	0	0	0	0	0	0	0	0	0.001	0	0	0	0	0
Bacteria	Proteobacteria	Gammaproteobacteria	Legionellales	Coxiellaceae	Coxiella	0	0	0	0	0	0	0	0	0	0	0	0	0	0	0	0	0	0	0	0	0	0	0	0	0.001	0	0	0	0
Bacteria	Proteobacteria	Gammaproteobacteria	Legionellales	Coxiellaceae	Diplorickettsia	0	0	0	0	0	0	0	0	0	0	0	0	0	0	0	0	0	0	0	0	0	0	0	0.001	0	0	0	0	0
Bacteria	Proteobacteria	Gammaproteobacteria	Legionellales	Coxiellaceae	Other	0	0	0	0	0	0	0	0	0	0	0	0	0	0	0	0	0	0	0	0	0	0	0	0	0	0	0	0	0
Bacteria	Proteobacteria	Gammaproteobacteria	Xanthomonadales	Sinobacteraceae	Alkanibacter	0	0	0	0	0	0	0	0	0	0	0	0	0	0	0	0	0	0	0	0	0	0	0	0	0	0	0	0	0
Bacteria	Proteobacteria	Gammaproteobacteria	Xanthomonadales	Sinobacteraceae	Nevskia	0	0	0	0	0	0	0	0	0	0	0	0	0	0	0	0	0	0.001	0	0	0	0	0	0	0	0	0	0	0.002
Bacteria	Proteobacteria	Gammaproteobacteria	Xanthomonadales	Sinobacteraceae	Other	0	0	0	0	0	0	0	0	0	0	0	0	0.007	0	0	0	0	0	0	0	0	0	0.002	0	0	0	0	0	0
Bacteria	Proteobacteria	Gammaproteobacteria	Xanthomonadales	Xanthomonadaceae	Other	0	0	0	0	0	0	0	0	0	0	0	0	0	0	0	0	0	0	0	0	0	0	0	0	0	0	0	0	0
Bacteria	Proteobacteria	Gammaproteobacteria	Xanthomonadales	Xanthomonadaceae	Rhodanobacter	0	0	0	0	0.001	0	0	0	0	0	0	0	0.001	0	0	0	0	0	0	0.002	0	0	0	0	0.001	0	0	0	0
Bacteria	Proteobacteria	Gammaproteobacteria	Xanthomonadales	Xanthomonadaceae	Rudaea	0	0	0	0	0	0	0	0	0	0	0	0	0.001	0	0	0	0	0	0	0	0	0	0	0	0	0	0	0	0
Bacteria	Proteobacteria	Gammaproteobacteria	Xanthomonadales	Xanthomonadaceae	Thermomonas	0	0	0	0	0	0	0	0	0	0	0	0	0	0	0	0	0	0	0	0	0	0	0.001	0	0	0	0	0	0
Bacteria	Proteobacteria	Gammaproteobacteria	Xanthomonadales	Xanthomonadaceae	Xanthomonas	0	0	0	0	0	0	0	0	0	0	0	0.003	0	0	0	0	0	0	0	0	0	0	0	0	0	0	0	0	0
Bacteria	Spirochaetes	Spirochaetia	Spirochaetales	Spirochaetaceae	Other	0	0	0.001	0	0	0	0	0	0	0.001	0	0	0	0.001	0	0	0.001	0	0	0	0	0.001	0	0	0	0	0.001	0	0.002
Bacteria	Synergistetes	Synergistia	Synergistales	Synergistaceae	Aminomonas	0.003	0.002	0.002	0.003	0.003	0.002	0	0.003	0.002	0	0.001	0	0.002	0.004	0.001	0.003	0.001	0.001	0.002	0.008	0.004	0.008	0.001	0.006	0.003	0	0.009	0	0.005
Bacteria	Synergistetes	Synergistia	Synergistales	Synergistaceae	Other	0.003	0.002	0	0	0.003	0.001	0	0.003	0.001	0	0.001	0	0.011	0.002	0	0	0	0.001	0.001	0.002	0	0.001	0	0	0.001	0	0	0	0.001
Archaea	Thaumarchaeota	Nitrososphaerales	Nitrososphaerales	Nitrososphaeraceae	Nitrososphaera	0.024	0.033	0.106	0.095	0.055	0.03	0.003	0.003	0.033	0.122	0.004	0.035	0.01	0.025	0.022	0.088	0.057	0.043	0.03	0.016	0.004	0.031	0.03	0.001	0.006	0.001	0.076	0.005	0.031
Archaea	Thaumarchaeota	Other	Other	Other	Other	0	0	0	0	0	0	0	0	0	0.004	0	0	0	0	0	0	0	0	0	0	0	0	0	0	0	0	0	0	0
Bacteria	Verrucomicrobia	Spartobacteria	Spartobacteria_genera_incertae_sedis	Spartobacteria_genera_incertae_sedis	Spartobacteria_genera_incertae_sedis	0.004	0.01	0.001	0.001	0.007	0.011	0.001	0	0.007	0	0.006	0.006	0.004	0.003	0.001	0.001	0	0.001	0	0.002	0.003	0.002	0	0.013	0.019	0	0.005	0	0
Bacteria	Verrucomicrobia	Subdivision3	Subdivision3_genera_incertae_sedis	Subdivision3_genera_incertae_sedis	Subdivision3_genera_incertae_sedis	0.003	0.006	0.002	0	0.006	0.006	0	0	0.002	0.004	0.002	0.006	0.003	0.003	0.014	0.001	0	0.001	0.002	0	0	0	0	0	0.001	0	0.002	0	0
Bacteria	Verrucomicrobia	Opitutae	Opitutales	Opitutaceae	Opitutus	0	0	0	0	0	0	0	0	0	0	0	0	0	0	0	0	0	0	0	0	0	0	0	0	0.001	0	0	0	0
Bacteria	Verrucomicrobia	Spartobacteria	Other	Other	Other	0	0	0	0	0	0	0	0	0	0	0	0	0	0	0.001	0	0	0	0	0	0	0	0	0	0	0	0	0	0
Archaea	Woesearchaeota	Woesearchaeota Incertae Sedis AR15	Woesearchaeota Incertae Sedis AR15	Woesearchaeota Incertae Sedis AR15	Woesearchaeota Incertae Sedis AR15	0	0	0.001	0.001	0	0	0	0	0	0	0	0	0	0	0	0.001	0.001	0	0	0	0	0	0	0	0	0	0	0	0
Archaea	Woesearchaeota	Other	Other	Other	Other	0	0	0	0	0	0	0	0	0	0	0	0	0	0	0	0	0	0	0	0	0	0	0	0	0	0	0	0	0
Archaea	Woesearchaeota	Woesearchaeota Incertae Sedis AR16	Woesearchaeota Incertae Sedis AR16	Woesearchaeota Incertae Sedis AR16	Woesearchaeota Incertae Sedis AR16	0	0	0	0	0	0	0	0	0	0	0	0	0	0	0	0	0	0	0	0	0	0	0	0	0	0	0	0	0
